# Supplementary material for: Iso-Compass: new freeware software for isotopic data reduction of LA-MC-ICP-MS
Source: Royal Society of Chemistry journal article supplement (doi:10.1039/d0ja00084a), 2020-01-01
Supplement: d0ja00084a2.pdf [file d0ja00084a2.pdf]

**Iso-Compass Isotope Data Reduction Software (Ver. 1.0)**

# **Iso-Compass User Manual**

**Isotope Data Reduction Software**

**(Ver. 1.0)**

Wen Zhang

State Key Laboratory of Geological Processes and Mineral Resources

China University of Geosciences (Wuhan)

No.388 Lumo Road, Wuhan city, Hubei province, P.R. China

E-mail: tuyaken@hotmail.com

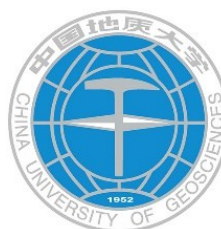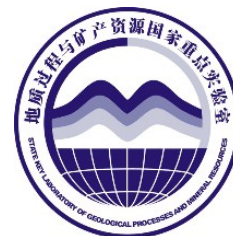

# Contents

|                                                 |           |
|-------------------------------------------------|-----------|
| <b>1. Software introduction</b> .....           | <b>3</b>  |
| 1.1 Iso-Compass .....                           | 3         |
| 1.2 Software features .....                     | 3         |
| 1.3 Operating environment .....                 | 3         |
| <b>2. Software installation</b> .....           | <b>5</b>  |
| <b>3. Software workflow and functions</b> ..... | <b>8</b>  |
| 3.1 Software workflow .....                     | 8         |
| 3.2 Select initial file information .....       | 10        |
| 3.3 Create an analysis method template .....    | 12        |
| 3.3.1 Read data .....                           | 12        |
| 3.3.2 "Formula" module .....                    | 14        |
| 3.3.3 "Normalization" module .....              | 17        |
| 3.3.4 "Export" module .....                     | 19        |
| 3.4 Data reduction .....                        | 20        |
| 3.5 Saving data and exporting reports .....     | 22        |
| <b>4. Laser-MC-ICP-MS data reduction</b> .....  | <b>25</b> |
| 4.1 Data preparation .....                      | 25        |
| 4.2 Data import .....                           | 25        |
| 4.3 Data reduction .....                        | 26        |
| 4.4 Data export .....                           | 27        |

# 1. Software introduction

## 1.1 Iso-Compass

Iso-Compass is an isotope composition data reduction software developed by the LA-ICP-MS Division of **the State Key Laboratory of Geological Processes and Mineral Resources, China University of Geosciences (Wuhan)**. The software is mainly used for processing raw isotope data in a batch and pattern manner, with the aim of processing the isotope data rapidly and flexibly.

## 1.2 Software features

1. Reads MC-ICP-MS raw data simply and conveniently; combines graphs and tables to display data intuitively and accurately.
2. Flexibly writes data correction formulas, including instrument mass fraction correction (such as internal standard correction, SSB correction, and external element correction) and interference correction.
3. Satisfies solution MC-ICP-MS data reduction and laser MC-ICP-MS data reduction to achieve batch processing of high-precision isotopic composition absolute and delta data.
4. Quickly formulates the output report format to achieve a formatted report.
5. The software is based on the .Net framework and it can be used independently on the Windows operating system, without installing other commercial software.

## 1.3 Operating environment

### Hardware requirements

- Recommended minimum configuration: Pentium 1 GHz or above, 512 MB RAM or above
- Minimum disk space: x86 – 850 MB; x64 – 2 GB

### Applicable software

## **Iso-Compass Isotope Data Reduction Software (Ver. 1.0)**

- Windows XP SP3
- Windows Vista SP1 or above
- Windows Server 2008 (not supported on Server Core roles)
- Windows Server 2008 R2 (not supported on Server Core roles)
- Windows 7 SP1 operating system and above
- Windows Server 2008 R2 SP1 operating system and above

## 2. Software installation

The IsoCompass installation package contains the following files. Click "setup.exe" to start the installation.

| 名称         | 修改日期            | 类型                 | 大小       |
|------------|-----------------|--------------------|----------|
| DotNetFX46 | 2019/1/16 22:38 | 文件夹                |          |
| setup.exe  | 2019/1/16 22:38 | 应用程序               | 772 KB   |
| Setup.msi  | 2019/1/16 22:38 | Windows Install... | 1,699 KB |

Figure 2.1 IsoCompass installation package

When the dialog box displayed in Fig. 2.2 pops up, click "Next."

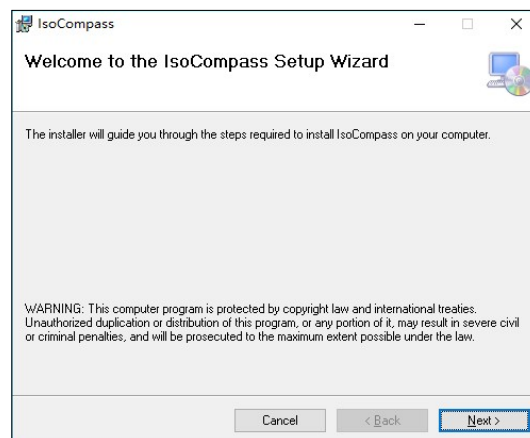

Figure 2.2 Installation process

Click "Browse" and select the software installation path.

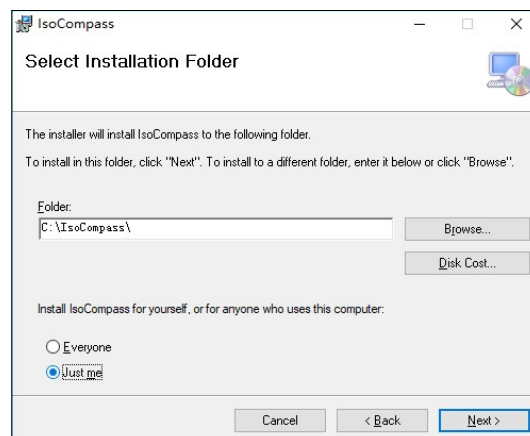

Figure 2.3 Installation process

## Iso-Compass Isotope Data Reduction Software (Ver. 1.0)

After selecting the installation path, click "Next." Once the software installation is complete, click "Close" to exit.

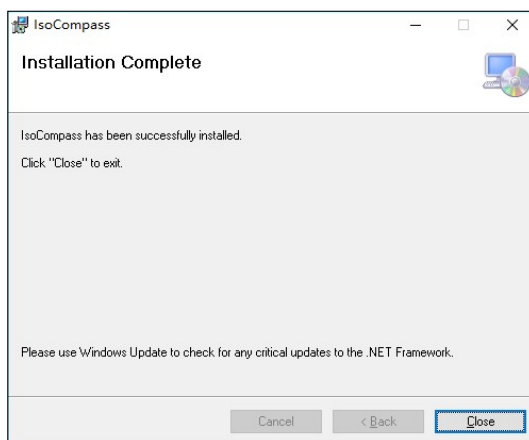

Figure 2.4 Software installation complete

This software comes with the Microsoft .NET Framework 4 installation package. If the installation system finds that the pre-installed Microsoft .NET Framework 4 is missing, the installation system will first install Microsoft .NET Framework 4, and then install the Iso-Compass software.

The Iso-Compass software following installation is illustrated in Fig. 2.5.

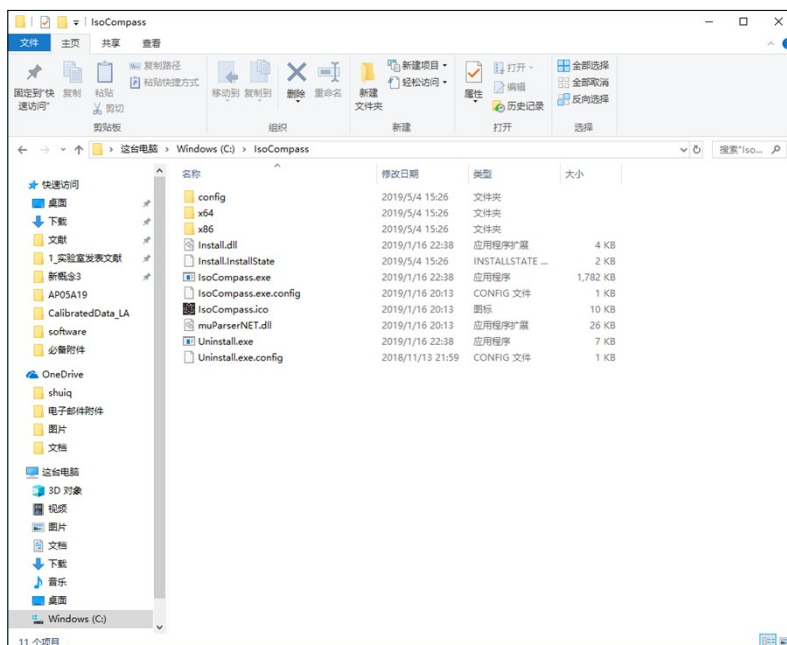

Figure 2.5 Iso-Compass folder

Once the software installation is complete, you need to register. Firstly,

## Iso-Compass Isotope Data Reduction Software (Ver. 1.0)

click on the "IsoCompass.exe" file. Please open the file in “**administrator mode.**” If you are using the software for the first time, the following dialog box will pop up:

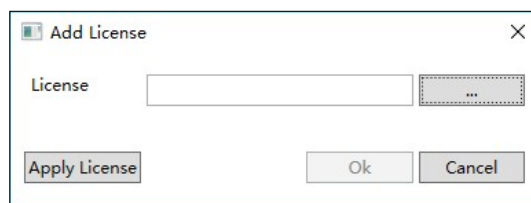

Figure 2.6 Verify software license

Please click "Apply License." The software will generate a document, "Requestcode.txt." Please send this document to the e-mail address "tuyaken@hotmail.com" to apply for a software license from the author. Please search for "Requestcode.txt" in the software installation folder.

After obtaining a valid software license, you can directly find the path where the software license is located. After confirming the license path, the software will prompt the validity period of the license. Please click "OK" to complete the verification.

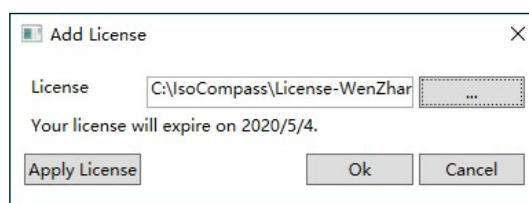

Figure 2.7 Software license verified

If the software license has expired, please send an e-mail to "tuyaken@hotmail.com" to obtain a new license.

### 3. Software workflow and functions

#### 3.1 Software workflow

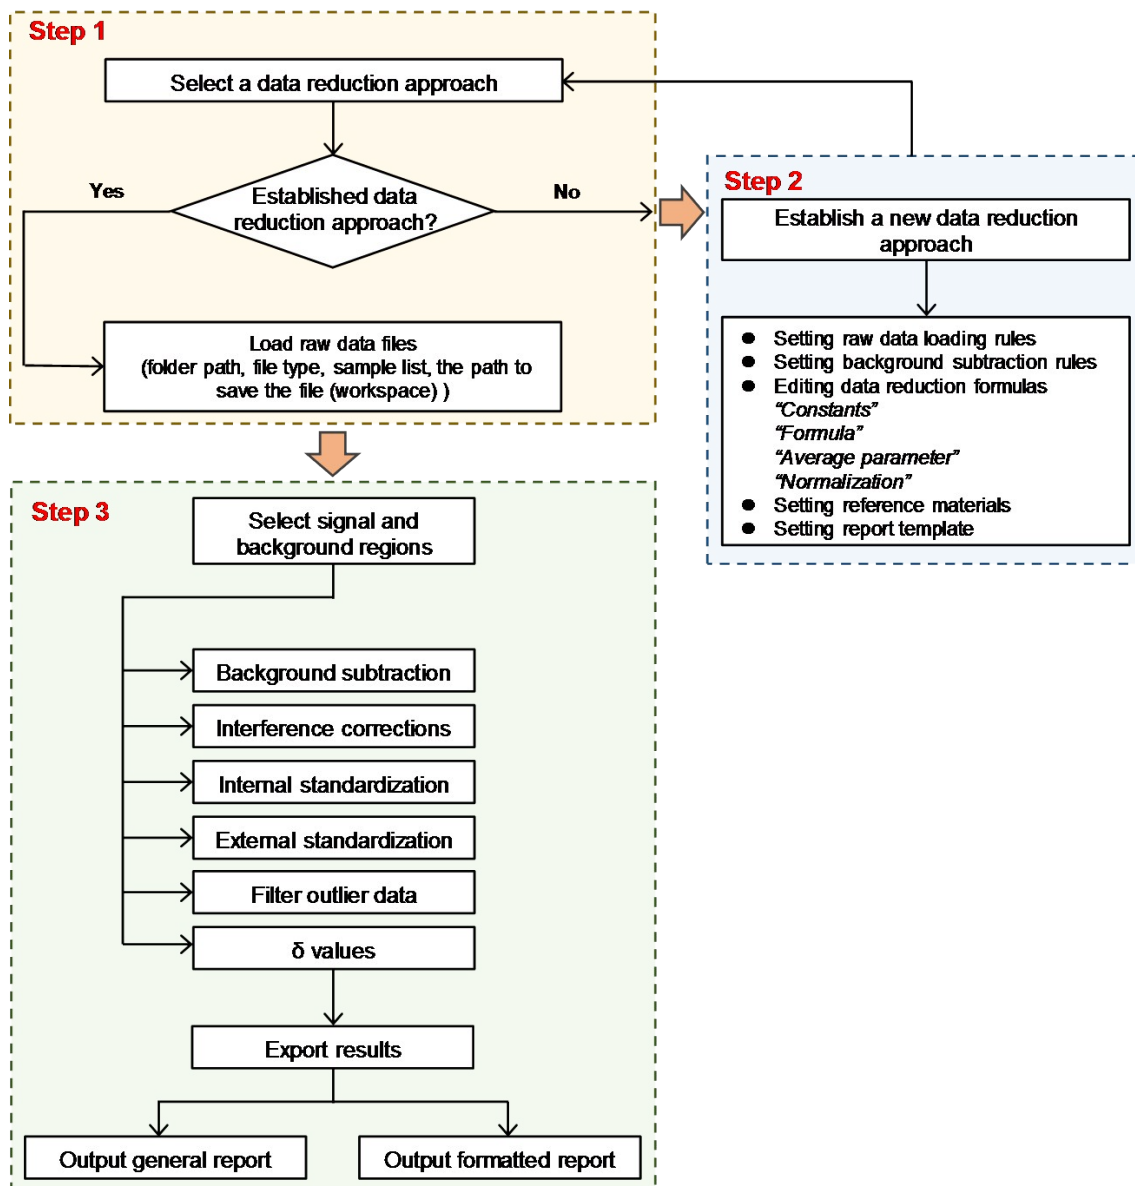



### 3.2 Select initial file information

After clicking the "IsoCompass.exe" file, the welcome screen will appear, followed by the initial dialog box of the software. In the initial dialog, you need to set "Workspace (data storage path)," "Folder (raw data storage path)," "File Type (raw data file format)," "SampleList (raw data list/optional)," and "Approach (Analysis method template)."

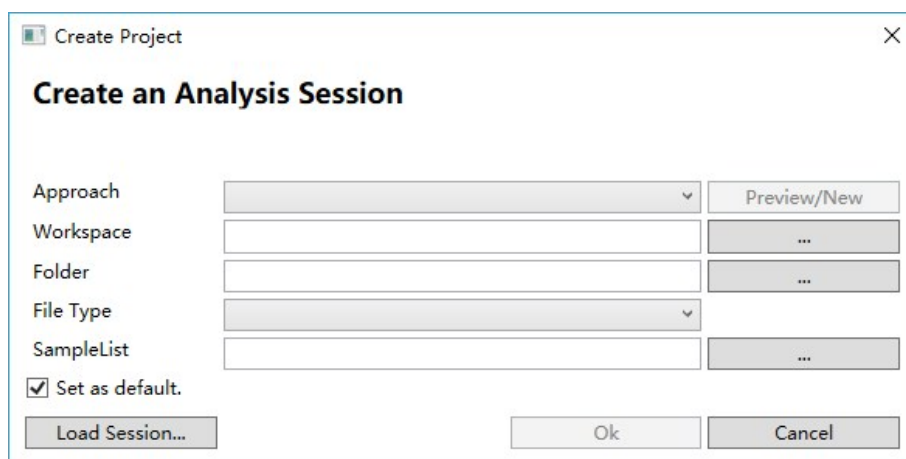

Figure 3.1 Iso-Compass data import interface

#### Workspace (data save path)

This is used to store all of the data output by the Iso-Compass software, including data reports saved in the output report and data reduction.

#### Folder (raw data storage path)

The folder in which the data to be processed are located.

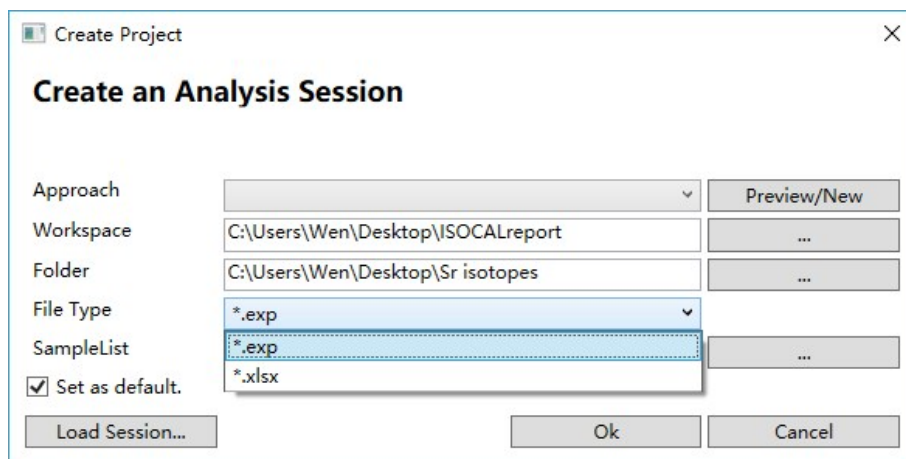

Figure 3.2 Iso-Compass data import interface

## Iso-Compass Isotope Data Reduction Software (Ver. 1.0)

### File Type (raw data file format)

In the folder where the data to be processed exist, if there are different document types, you can select the file format of the data to be processed. For example, the raw data files exported by Neptune Plus instruments are in the ".exp" format.

### SampleList (raw data list/optional)

As Iso-Compass can read all data in the specified file format in "Folder (raw data storage path)," Iso-Compass can read data without relying on "SampleList." However, the data only have the analysis test name, and no sample name. If you need the sample name for external standard calibration, you need to prepare a sample list (Excel format). The sample list needs to be recorded in the specified format, as illustrated in Fig. 3.3. Iso-Compass will depend on the file name in "Folder (raw data storage path)" to find the corresponding sample name in "SampleList."

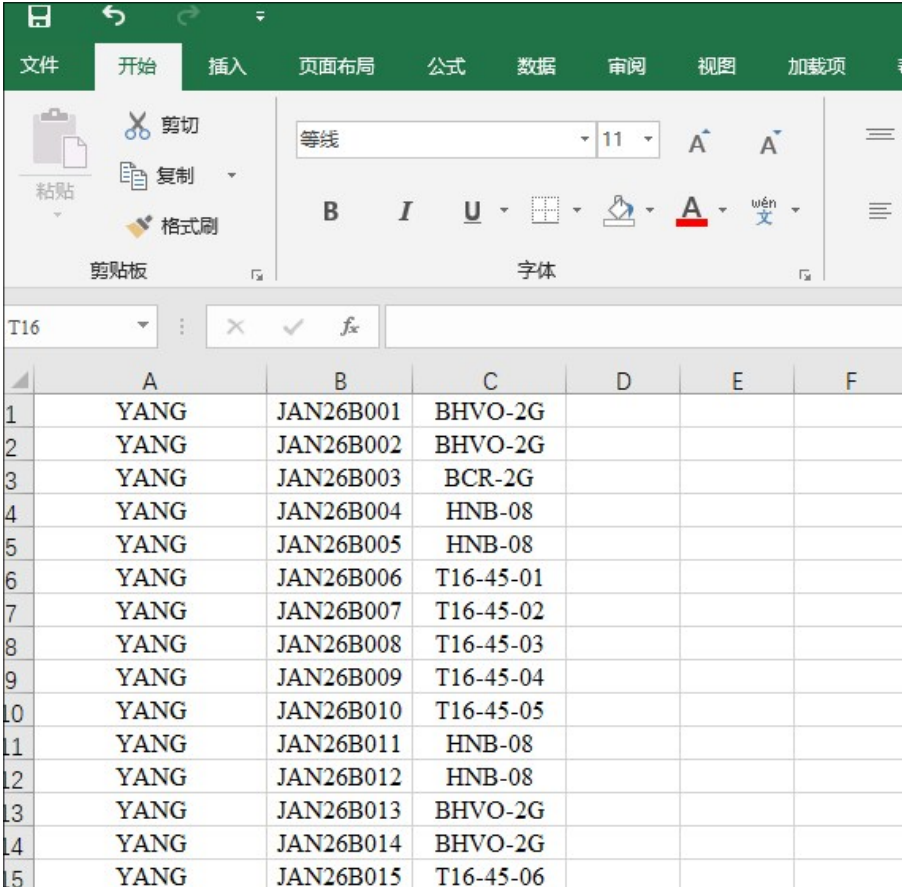

|    | A    | B         | C         | D | E | F |
|----|------|-----------|-----------|---|---|---|
| 1  | YANG | JAN26B001 | BHVO-2G   |   |   |   |
| 2  | YANG | JAN26B002 | BHVO-2G   |   |   |   |
| 3  | YANG | JAN26B003 | BCR-2G    |   |   |   |
| 4  | YANG | JAN26B004 | HNB-08    |   |   |   |
| 5  | YANG | JAN26B005 | HNB-08    |   |   |   |
| 6  | YANG | JAN26B006 | T16-45-01 |   |   |   |
| 7  | YANG | JAN26B007 | T16-45-02 |   |   |   |
| 8  | YANG | JAN26B008 | T16-45-03 |   |   |   |
| 9  | YANG | JAN26B009 | T16-45-04 |   |   |   |
| 10 | YANG | JAN26B010 | T16-45-05 |   |   |   |
| 11 | YANG | JAN26B011 | HNB-08    |   |   |   |
| 12 | YANG | JAN26B012 | HNB-08    |   |   |   |
| 13 | YANG | JAN26B013 | BHVO-2G   |   |   |   |
| 14 | YANG | JAN26B014 | BHVO-2G   |   |   |   |
| 15 | YANG | JAN26B015 | T16-45-06 |   |   |   |

Figure 3.3 List file writing format

### "Set as default"

This sets the parameters set above to the default values.

After setting "Workspace (data storage path)," "Folder (raw data storage path)," and "File Type (raw data file format)," you can select an edited analysis method template in "Approach (analysis method template)" and then click "OK" to start data reduction. You can also click "Preview/New" in "Approach" to view or modify the edited analysis method template.

If no suitable analysis method template is available, you can click "Preview/New" to create a new analysis method template (see following section).

You can click "Load Session" to read the previously saved session data.

## 3.3 Create analysis method template

### 3.3.1 Read data

Click "Preview/New" in "Approach" and an initial analysis method template will appear.

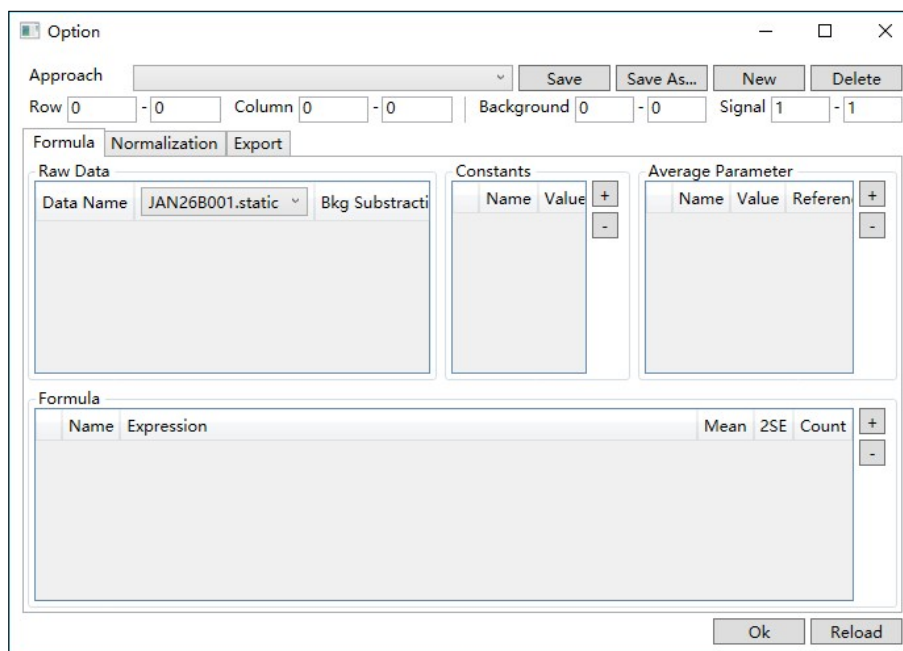

Figure 3.1 Initial analysis method template interface

First click "New" and enter the name of the new analysis method.

## Iso-Compass Isotope Data Reduction Software (Ver. 1.0)

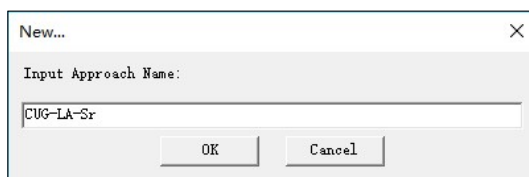

Figure 3.2 Enter name of new analysis method

Thereafter, you need to set the "row" and "column" path of the file data to be processed. You need to open a raw file of the data to be processed, as with the Sr isotope raw data file displayed below:

| R152                                                       |               |          |           |          |           |          |           |           |           |   |   |   |  |  |
|------------------------------------------------------------|---------------|----------|-----------|----------|-----------|----------|-----------|-----------|-----------|---|---|---|--|--|
| A                                                          | B             | C        | D         | E        | F         | G        | H         | I         | J         | K | L | M |  |  |
| Triton Analysis Data Report                                |               |          |           |          |           |          |           |           |           |   |   |   |  |  |
| Run-Number-View                                            |               |          |           |          |           |          |           |           |           |   |   |   |  |  |
| Filename: F:\2019_LASER\MC19_025_YANGXIAOSONG\JAN26B01.dat |               |          |           |          |           |          |           |           |           |   |   |   |  |  |
| Date: 2019/1/28                                            |               |          |           |          |           |          |           |           |           |   |   |   |  |  |
| Sample ID:                                                 |               |          |           |          |           |          |           |           |           |   |   |   |  |  |
| Method Name:                                               |               |          |           |          |           |          |           |           |           |   |   |   |  |  |
| Wheel ID:                                                  |               |          |           |          |           |          |           |           |           |   |   |   |  |  |
| Run number: 0                                              |               |          |           |          |           |          |           |           |           |   |   |   |  |  |
| Analysis date: 2019/1/28                                   |               |          |           |          |           |          |           |           |           |   |   |   |  |  |
| Analysis time: 10:59:23                                    |               |          |           |          |           |          |           |           |           |   |   |   |  |  |
| Operator:                                                  |               |          |           |          |           |          |           |           |           |   |   |   |  |  |
| Instrument:                                                |               |          |           |          |           |          |           |           |           |   |   |   |  |  |
| Comment:                                                   |               |          |           |          |           |          |           |           |           |   |   |   |  |  |
|                                                            |               |          |           |          |           |          |           |           |           |   |   |   |  |  |
| Cycle                                                      | Time          | 83Kr     | 167Er++   | 84Sr     | 85Rb      | 85.9     | 173Yb++   | 87Sr      | 88Sr      |   |   |   |  |  |
| 16                                                         | 1 14:39:55.4  | 1.83E-04 | 4.57E-05  | 1.06E-03 | 1.07E-05  | 3.10E-04 | -7.01E-05 | 1.33E-04  | -8.97E-05 |   |   |   |  |  |
| 17                                                         | 2 14:39:55.9  | 2.13E-04 | -5.38E-05 | 1.06E-03 | -5.66E-06 | 2.58E-04 | -5.56E-05 | 3.15E-05  | 5.89E-05  |   |   |   |  |  |
| 18                                                         | 3 14:39:56.5  | 2.63E-04 | 2.25E-05  | 1.06E-03 | -4.43E-05 | 3.41E-04 | -5.87E-05 | -5.31E-05 | 5.77E-05  |   |   |   |  |  |
| 19                                                         | 4 14:39:57.0  | 1.85E-04 | 1.78E-05  | 9.78E-04 | -5.89E-06 | 3.46E-04 | -6.78E-05 | -4.84E-05 | 1.88E-05  |   |   |   |  |  |
| 20                                                         | 5 14:39:57.5  | 1.95E-04 | -3.55E-06 | 1.06E-03 | -6.72E-05 | 2.71E-04 | -1.60E-05 | 3.34E-05  | 1.36E-05  |   |   |   |  |  |
| 21                                                         | 6 14:39:58.0  | 1.62E-04 | 2.58E-05  | 1.12E-03 | -4.52E-05 | 4.80E-04 | -2.09E-05 | 7.61E-07  | -5.90E-06 |   |   |   |  |  |
| 22                                                         | 7 14:39:58.6  | 2.42E-04 | 8.74E-06  | 9.92E-04 | 1.58E-04  | 2.81E-04 | -5.45E-05 | -2.12E-05 | 3.09E-05  |   |   |   |  |  |
| 23                                                         | 8 14:39:59.1  | 2.31E-04 | 2.39E-05  | 1.03E-03 | 1.14E-04  | 3.57E-04 | -6.72E-06 | -6.18E-05 | 3.35E-05  |   |   |   |  |  |
| 24                                                         | 9 14:39:59.6  | 3.01E-04 | -2.82E-05 | 1.02E-03 | 1.06E-04  | 3.93E-04 | -3.66E-05 | -2.78E-05 | 3.75E-05  |   |   |   |  |  |
| 25                                                         | 10 14:40:00.1 | 2.57E-04 | -2.38E-05 | 1.05E-03 | 4.41E-06  | 3.26E-04 | -4.73E-05 | -2.29E-05 | 4.06E-05  |   |   |   |  |  |
| 26                                                         | 11 14:40:00.7 | 1.88E-04 | -2.30E-05 | 1.14E-03 | 7.58E-05  | 3.96E-04 | -4.62E-05 | -5.29E-05 | 9.83E-07  |   |   |   |  |  |
| 27                                                         | 12 14:40:01.2 | 1.91E-04 | 6.69E-06  | 1.07E-03 | -1.08E-05 | 3.98E-04 | -4.83E-05 | -1.12E-04 | -1.63E-06 |   |   |   |  |  |
| 28                                                         | 13 14:40:01.7 | 2.54E-04 | 1.17E-05  | 1.01E-03 | -1.27E-05 | 2.81E-04 | -9.05E-05 | -4.21E-07 | -8.12E-05 |   |   |   |  |  |
| 29                                                         | 14 14:40:02.3 | 2.10E-04 | 2.67E-05  | 9.91E-04 | 1.05E-05  | 3.29E-04 | -6.19E-05 | 9.48E-05  | 1.08E-04  |   |   |   |  |  |
| 30                                                         | 15 14:40:02.8 | 2.18E-04 | -5.29E-05 | 9.85E-04 | -1.43E-05 | 3.32E-04 | -4.55E-05 | -3.99E-05 | 1.78E-05  |   |   |   |  |  |
| 31                                                         | 16 14:40:03.3 | 2.35E-04 | 1.01E-05  | 1.07E-03 | 2.36E-05  | 2.74E-04 | -4.06E-05 | -9.16E-06 | -6.38E-06 |   |   |   |  |  |
| 32                                                         | 17 14:40:03.8 | 1.83E-04 | 7.18E-06  | 1.01E-03 | 3.13E-05  | 3.38E-04 | -1.83E-05 | 3.45E-05  | 9.06E-06  |   |   |   |  |  |
| 33                                                         | 18 14:40:04.4 | 1.81E-04 | -1.84E-05 | 1.03E-03 | 7.53E-05  | 2.52E-04 | -2.83E-05 | -4.58E-05 | -4.70E-05 |   |   |   |  |  |
| 34                                                         | 19 14:40:04.9 | 2.00E-04 | -3.57E-05 | 1.12E-03 | 5.92E-05  | 2.98E-04 | -9.55E-06 | -3.75E-05 | 1.43E-05  |   |   |   |  |  |
| 35                                                         | 20 14:40:05.4 | 1.92E-04 | 2.55E-05  | 1.04E-03 | 9.32E-06  | 3.27E-04 | -6.24E-05 | -7.11E-05 | 7.20E-05  |   |   |   |  |  |
| 36                                                         | 21 14:40:05.9 | 2.02E-04 | 1.75E-05  | 9.43E-04 | 6.43E-05  | 3.28E-04 | -4.90E-05 | -2.48E-05 | -5.62E-05 |   |   |   |  |  |
| 37                                                         | 22 14:40:06.5 | 2.57E-04 | 7.44E-06  | 1.03E-03 | 7.92E-06  | 3.07E-04 | -5.28E-05 | -7.22E-05 | 1.19E-05  |   |   |   |  |  |
| 38                                                         | 23 14:40:07.0 | 2.61E-04 | 3.43E-05  | 9.87E-04 | 3.83E-05  | 3.96E-04 | -2.86E-05 | -1.13E-05 | 7.10E-05  |   |   |   |  |  |
| 39                                                         | 24 14:40:07.5 | 1.94E-04 | 4.27E-05  | 1.06E-03 | -1.97E-05 | 3.47E-04 | -3.31E-05 | 1.94E-06  | -1.04E-05 |   |   |   |  |  |
| 40                                                         | 25 14:40:08.0 | 2.04E-04 | -3.17E-05 | 9.67E-04 | -2.79E-05 | 4.05E-04 | -2.18E-05 | -2.71E-05 | 3.07E-05  |   |   |   |  |  |
| 41                                                         | 26 14:40:08.6 | 2.02E-04 | -6.55E-05 | 1.03E-03 | -3.14E-05 | 2.45E-04 | -4.87E-05 | 6.38E-05  | 4.42E-05  |   |   |   |  |  |
| 42                                                         | 27 14:40:09.1 | 2.29E-04 | -3.40E-05 | 9.76E-04 | -2.48E-05 | 3.50E-04 | -7.10E-05 | -1.60E-06 | 2.02E-05  |   |   |   |  |  |
| 43                                                         | 28 14:40:09.6 | 2.00E-04 | 1.10E-05  | 1.09E-03 | 3.74E-05  | 2.39E-04 | -6.84E-05 | -1.28E-04 | 9.53E-06  |   |   |   |  |  |
| 44                                                         | 29 14:40:10.2 | 2.50E-04 | -9.65E-06 | 1.02E-03 | -1.81E-05 | 4.43E-04 | -2.21E-05 | 5.49E-06  | -5.62E-05 |   |   |   |  |  |
| 45                                                         | 30 14:40:10.7 | 2.19E-04 | -5.22E-05 | 1.06E-03 | 4.09E-05  | 3.44E-04 | -1.85E-05 | -3.33E-05 | 3.40E-05  |   |   |   |  |  |
| 46                                                         | 31 14:40:11.2 | 2.26E-04 | -5.29E-05 | 1.10E-03 | -3.32E-06 | 2.60E-04 | -8.96E-05 | 7.30E-05  | 5.97E-06  |   |   |   |  |  |
| 47                                                         | 32 14:40:11.7 | 2.41E-04 | 1.59E-05  | 8.98E-04 | -1.76E-05 | 1.59E-04 | -3.76E-05 | 1.35E-05  | 5.02E-06  |   |   |   |  |  |
| 48                                                         | 33 14:40:12.3 | 1.68E-04 | 3.05E-05  | 9.35E-04 | 6.60E-05  | 3.24E-04 | -3.98E-06 | 4.49E-05  | -7.36E-05 |   |   |   |  |  |
| 49                                                         | 34 14:40:12.8 | 1.93E-04 | 2.32E-05  | 1.04E-03 | 1.82E-05  | 3.46E-04 | -6.19E-05 | 1.38E-05  | -4.98E-05 |   |   |   |  |  |
| 50                                                         | 35 14:40:13.3 | 1.54E-04 | 1.84E-05  | 1.09E-03 | 4.44E-05  | 3.91E-04 | -3.27E-05 | -1.20E-04 | -3.27E-05 |   |   |   |  |  |
| 51                                                         | 36 14:40:13.8 | 2.15E-04 | -8.23E-06 | 9.75E-04 | 7.32E-05  | 3.54E-04 | -4.51E-05 | 4.66E-05  | -1.68E-05 |   |   |   |  |  |
| 52                                                         | 37 14:40:14.4 | 2.02E-04 | -1.50E-05 | 9.65E-04 | -7.42E-07 | 2.74E-04 | 5.42E-06  | -5.38E-06 | -4.44E-05 |   |   |   |  |  |

Figure 3.3 Sr isotope raw data file of Neptune Plus (in ".exp" format)

You should find the start and end numbers of the row and column of the data to read them. For example, the data start at row 16 and end at row 175, and start at column C (column 3) and end at column J (column 10).

## Iso-Compass Isotope Data Reduction Software (Ver. 1.0)

Enter the data into "Row" and "Column."

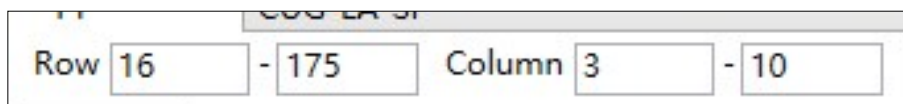

The screenshot shows a software window with a title bar. Below the title bar, there are two input fields. The first is labeled "Row" and contains the number "16". To its right is a minus sign and another input field containing "175". The second is labeled "Column" and contains the number "3". To its right is a minus sign and another input field containing "10".

Figure 3.4 Enter row and column numbers of data to read them

You can design the background and signal interval in the imported data in advance. For example, the 1<sup>st</sup> to 45<sup>th</sup> data points are background intervals, while the 65<sup>th</sup> to 140<sup>th</sup> data points are signal intervals.

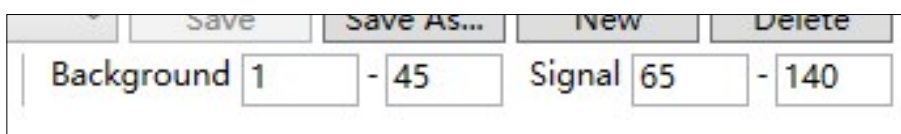

The screenshot shows a software window with a title bar. Below the title bar, there are four buttons: "Save", "Save As...", "New", and "Delete". Below these buttons, there are two input fields. The first is labeled "Background" and contains the number "1". To its right is a minus sign and another input field containing "45". The second is labeled "Signal" and contains the number "65". To its right is a minus sign and another input field containing "140".

Figure 3.5 Set signal acquisition interval of data

### 3.3.2 "Formula" module

After setting the "row" and "column" locations of the data, "Raw Data" will display the name of the isotope to be tested for each data column. Note: "r\_1, r\_2, r\_x" are used as the code of the corresponding isotope, which is used for subsequent formula editing.

Check the small box under "Bkg Substraction" and the ticked "Bkg Substraction" box to which it refers will perform background correction. The background deduction principle of the Iso-Compass software is as follows: firstly, select the interval of the background signal through "Background," then remove the 2SD outlier data from the background interval and calculate the average of the remaining data as the "background value." Data with the ticked "Bkg Substraction" box will subtract "background value" from the original data.

## Iso-Compass Isotope Data Reduction Software (Ver. 1.0)

| Formula         |                  |                                     | Normalization | Export |
|-----------------|------------------|-------------------------------------|---------------|--------|
| <b>Raw Data</b> |                  |                                     |               |        |
| Data Name       | APR29B001.static | Bkg Subtraction                     |               |        |
| r_1             | 83Kr             | <input checked="" type="checkbox"/> |               |        |
| r_2             | 167Er++          | <input checked="" type="checkbox"/> |               |        |
| r_3             | 84Sr             | <input checked="" type="checkbox"/> |               |        |
| r_4             | 85Rb             | <input checked="" type="checkbox"/> |               |        |
| r_5             | 85.90            | <input checked="" type="checkbox"/> |               |        |
| r_6             | 173Yb++          | <input checked="" type="checkbox"/> |               |        |
| r_7             | 87Sr             | <input checked="" type="checkbox"/> |               |        |
| r_8             | 88Sr             | <input checked="" type="checkbox"/> |               |        |

Figure 3.6 Original signal reading and background value subtraction

You can edit formulas in "Formula," including calculation methods such as addition, subtraction, multiplication, division, and exponent. As indicated in the figure below, "f1" refers to a formula code, which can be used for formula calculation. "Name" refers to the actual formula name and it cannot be used in calculations, but it is indicated as the formula name in the following diagrams. You can enter specific formulas in "Expression."

| Formula |            |                                                                        |                                     |                                     |                          |
|---------|------------|------------------------------------------------------------------------|-------------------------------------|-------------------------------------|--------------------------|
| Name    | Expression | Mean                                                                   | 2SE                                 | Count                               |                          |
| f1      | 84Sr       | $r_3 - r_1 * c1 * (57/11.49) - r_2 * (26.978/22.869)$                  | <input type="checkbox"/>            | <input type="checkbox"/>            | <input type="checkbox"/> |
| f2      | 85Rb       | $r_4 - r_2 * (14.91/22.869) - r_6 * (2.982/16.103)$                    | <input checked="" type="checkbox"/> | <input type="checkbox"/>            | <input type="checkbox"/> |
| f3      | 87Sr-Rb    | $r_7 - r_6 * (32.26/16.103)$                                           | <input type="checkbox"/>            | <input type="checkbox"/>            | <input type="checkbox"/> |
| f4      | 86Sr       | $r_5 - r_1 * c1 * (17.3/11.49) - r_6 * (21.68/16.103)$                 | <input type="checkbox"/>            | <input type="checkbox"/>            | <input type="checkbox"/> |
| f5      | 88Sr       | $r_8 - r_6 * (12.996/16.103)$                                          | <input checked="" type="checkbox"/> | <input type="checkbox"/>            | <input type="checkbox"/> |
| f6      | F-Sr       | $\ln(8.37521 / ((f5/f4) / \ln(87.90562/85.90927)))$                    | <input type="checkbox"/>            | <input type="checkbox"/>            | <input type="checkbox"/> |
| f7      | F-Rb       | $\ln(0.38571 / (((f3 - f4 * c2) / ((87/86)^{f6})) / f2)) / \ln(87/85)$ | <input type="checkbox"/>            | <input type="checkbox"/>            | <input type="checkbox"/> |
| f8      | F-Rb/F-Sr  | $f7/f6$                                                                | <input checked="" type="checkbox"/> | <input type="checkbox"/>            | <input type="checkbox"/> |
| f9      | 87Sr       | $f3 - f2 * 0.38571 / (((87/85)^{f6 * c3}))$                            | <input type="checkbox"/>            | <input type="checkbox"/>            | <input type="checkbox"/> |
| f11     | 87Sr/86Sr  | $f9/f4 * ((87/86)^{f6})$                                               | <input checked="" type="checkbox"/> | <input checked="" type="checkbox"/> | <input type="checkbox"/> |
| f1      | 84Sr/86Sr  | $f1/f4 * ((84/86)^{f6})$                                               | <input checked="" type="checkbox"/> | <input checked="" type="checkbox"/> | <input type="checkbox"/> |
| f1      | 83Kr       | $r_1$                                                                  | <input checked="" type="checkbox"/> | <input type="checkbox"/>            | <input type="checkbox"/> |
| f1      | Rb/Sr      | $(f2/f5) * 1.144$                                                      | <input checked="" type="checkbox"/> | <input type="checkbox"/>            | <input type="checkbox"/> |

Figure 3.7 Data reduction and editing formulas

For example, the original signal of <sup>84</sup>Sr is (r\_3), and the interference from <sup>83</sup>Kr+(r\_1) and <sup>67</sup>Er++ (r\_2) needs to be subtracted. Then, the correction formula is " $r_3 - r_1 * c1 * (57/11.49) - r_2 * (26.978/22.869)$ ," where "c1" is a constant parameter set in "Constants." "Constants" can be used to record certain commonly used constant parameters, but the value must be a number and not a formula.

## Iso-Compass Isotope Data Reduction Software (Ver. 1.0)

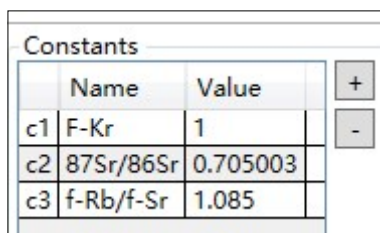

|  | Name | Value     |          |
|--|------|-----------|----------|
|  | c1   | F-Kr      | 1        |
|  | c2   | 87Sr/86Sr | 0.705003 |
|  | c3   | f-Rb/f-Sr | 1.085    |

Figure 3.8 Designing constant terms in formula editing

Note: The data in "Formula" are calculated based on the data in each "cycle" (the smallest data unit), following which the average value and relative standard error (2SE) are provided.

### Calculations supported by "Formula":

Addition: "+"

Subtraction: "-"

Multiplication: "\*"

Division: "/"

Index: "^"

Natural logarithm: "ln()"

Iso-Compass provides a special constant calculation mode, "Average Parameter." The calculation module supports entering a calculation formula to obtain a constant. That is, the user can enter a calculation formula in this module; for example, the calculation formula for calculating the Hf isotope fractionation factor in Hf isotope analysis, and then the formula outputs the average value of the fractionation factor. The user can opt to use the average value of the fractionation factor to correct the mass fractionation or use the fractionation factor in "Formula" to perform a one-to-one mass fractionation correction.

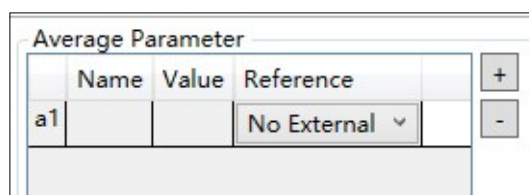

|  | Name | Value | Reference   |  |
|--|------|-------|-------------|--|
|  | a1   |       | No External |  |

Figure 3.9 Designing variable constants in formula editing

The "Average Parameter" function can also be used. You need to use a calibration parameter in the reference material to correct the data in the actual analysis sample. For example, if you need to correct the interference of Rb on the Sr isotope, you can analyze a reference substance containing Rb before analyzing the actual sample, calculate the Rb isotope fractionation factor from

## Iso-Compass Isotope Data Reduction Software (Ver. 1.0)

the reference substance, and then use this isotope fractionation factor for the actual sample. You simply need to select the desired "Reference" name in "Average Parameter" (such as NIST610). This indicates that the constant "a1" is calculated by all selected NIST610 in this data reduction, and this constant can subsequently be used in the "Formula" formula.

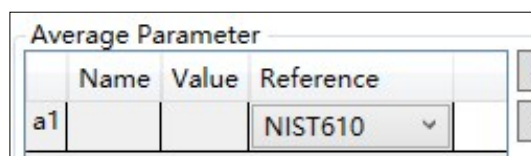

Figure 3.10 Designing variable constants in formula editing

### 3.3.3 "Normalization" module

The "Normalization" module is used to implement external standard correction. External standard calibration first requires the user to provide an accurate sample name. A reference material data file "ReferenceData.exp" (C:\IsoCompass\config) is provided in Iso-Compass. The user can add the required reference substance name to the database, and enter the isotope name and accurate isotope ratio.

|   | A       | B           | C           | D           | E           | F           | G         | H         |
|---|---------|-------------|-------------|-------------|-------------|-------------|-----------|-----------|
| 1 |         | 208Pb/206Pb | 207Pb/206Pb | 208Pb/204Pb | 207Pb/204Pb | 206Pb/204Pb | 87Sr/86Sr | 84Sr/86Sr |
| 2 | NIST610 | 2.169       | 0.91        | 36.991      | 15.515      | 17.052      |           |           |
| 3 | NIST612 | 2.165       | 0.907       | 37.02       | 15.516      | 17.099      |           |           |
| 4 | BCR-2G  | 2.063       | 0.832       | 38.709      | 15.614      | 18.761      | 0.705003  | 0.05657   |
| 5 | BHVO-2G |             |             | 38.273      | 15.591      | 18.778      | 0.703469  | 0.05657   |
| 6 | BIR-2G  |             |             |             |             |             | 0.703105  | 0.05657   |
| 7 | NBS981  | 2.168       | 0.915       | 36.726      | 15.5        | 16.942      |           |           |
| 8 | NBS987  |             |             |             |             |             | 0.710241  | 0.05657   |

Figure 3.11 Reference material data file "ReferenceData.exp"

You can find the names of the reference materials in the database in "Reference Materials" of "Normalization" in the software and then select the required reference materials.



## Iso-Compass Isotope Data Reduction Software (Ver. 1.0)

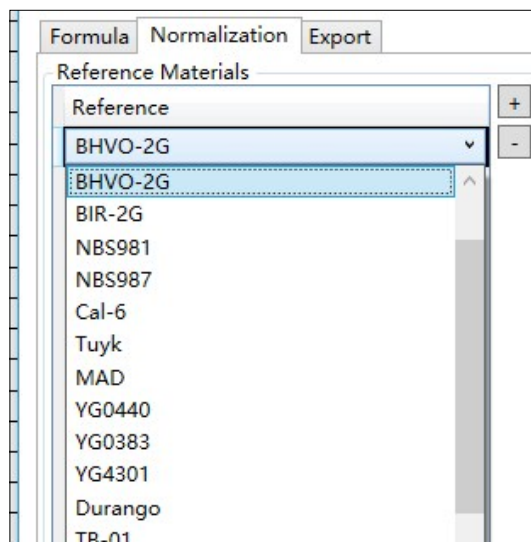

Figure 3.12 Selecting externally calibrated reference substance

In "Corrected Isotopic Ratio," select the isotope ratio of the reference material in the "Reference Isotop" column and then select the name of the formula written in the "Formula" module in the actual analysis in "Measured Data". As indicated in the figure below,  $^{87}\text{Sr}/^{86}\text{Sr}$  is provided to correct the reference value of the reference substance.

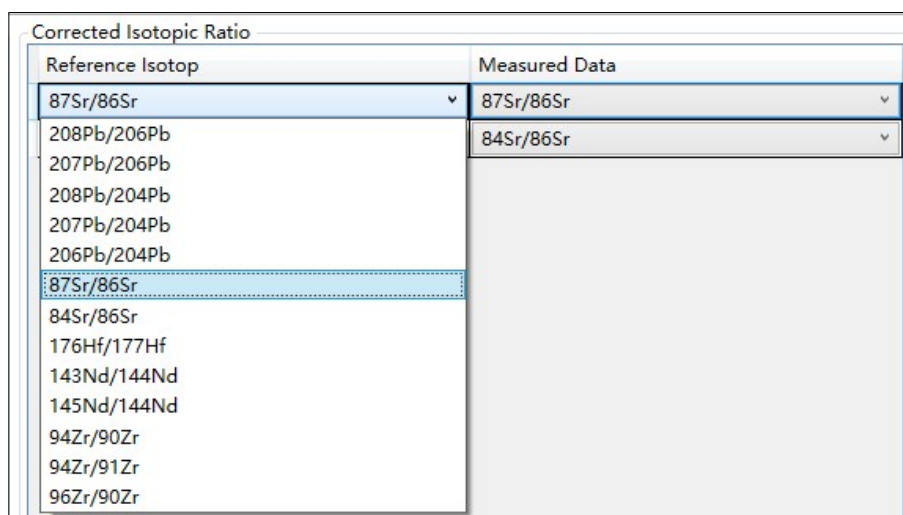

Figure 3.13 Selecting isotope ratio for external calibration

After selecting the ratio of the reference material for the isotope to be corrected, select the correction scheme at the bottom:

**No Correction:** No external standard correction.

**Mean Correction:** Use the reference material before and after to calculate

## Iso-Compass Isotope Data Reduction Software (Ver. 1.0)

the correction factor, and take the average of the correction factor to correct the unknown sample.

**Interpolation Correction:** Calculate the average value of the front and back reference material separately. It is assumed that the isotope fractionation changes between the front and back reference materials in a linear manner. The linear interpolation method is used to calculate the correction factor for each unknown sample.

**Delta Calculation:** After checking "Mean Correction" or "Interpolation Correction," you can also decide whether to calculate the delta value.



Figure 3.14 External correction strategy

### 3.3.4 "Export" module

You can select the data to be exported in the "Export" module, which uses the parameters edited in "Formula." Select "Add all" and all of the data ticked in the "Mean" column of "Formula" will be listed. These data can be output to "Workspace (data storage path)." "Export Name" is the final export name, which you can edit again.

| Exported Name | Measured Data   | Order |              |
|---------------|-----------------|-------|--------------|
| 85Rb          | 85Rb            | 6     | Add          |
| 88Sr          | 88Sr            | 7     | Delete       |
| f-Rb/f-Sr     | f-Rb/f-Sr       |       | Add All      |
| 87Sr/86Sr     | 87Sr/86Sr       |       | Delete All   |
| Inner-2SE     | Inner-2SE       |       | New Template |
| Identity      | Identity        |       |              |
| K             | K               |       |              |
| 87Sr/86Sr     | Normalized Expr | 1     |              |

Figure 3.15 Data export

Iso-Compass provides a formatted report "New Template." Prior to formatting the output, you need to perform the following:

(a) Edit and determine the final "Export Name."

(b) Set the data to be output and the data order in the "Order" column. As indicated in the figure below, the data to be output, including "87Sr/86Sr," "2SE," "84Sr/86Sr," and "Rb/Sr," are numbered in the order of 1, 2, 3...

## Iso-Compass Isotope Data Reduction Software (Ver. 1.0)

| Exported Name | Measured Data   | Order |
|---------------|-----------------|-------|
| 85Rb          | 85Rb            | 6     |
| 88Sr          | 88Sr            | 7     |
| f-Rb/f-Sr     | f-Rb/f-Sr       |       |
| 87Sr/86Sr     | 87Sr/86Sr       |       |
| Inner-2SE     | Inner-2SE       |       |
| Identity      | Identity        |       |
| K             | K               |       |
| 87Sr/86Sr     | Normalized Expr | 1     |
| 2SE           | 2SE             | 2     |
| Reference     | Reference       |       |
| RE(ppm)       | RE(ppm)         |       |
| 84Sr/86Sr     | 84Sr/86Sr       |       |
| Inner-2SE     | Inner-2SE       |       |
| Identity      | Identity        |       |
| K             | K               |       |
| 84Sr/86Sr     | Normalized Expr | 3     |
| 2SE           | 2SE             | 4     |
| Reference     | Reference       |       |
| RE(ppm)       | RE(ppm)         |       |
| 83Kr          | 83Kr            |       |
| Rb/Sr         | Rb/Sr           | 5     |

Figure 3.16 Set data export format and edit data export order

(c) Click "New Template" and set a name for the template.

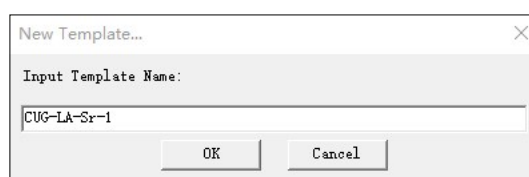

Figure 3.17 Create new format template

(d) An excel file will be opened automatically. Different sheets have been set for the file, including "Front Cover," "Back Cover," and "Data." You can design the document formats in different sheets according to your needs.

(e) Close the file after saving the Excel file. The template is created successfully and it is saved in the "IsoCompass\template" folder. The data reporting section that follows describes how to use this template.

### 3.4 Data reduction

After correctly setting the folder path, calibration method template, and sample list of the sample to be processed, click "OK" on the "Create an Analysis Session" page to enter the data reduction page.

## Iso-Compass Isotope Data Reduction Software (Ver. 1.0)

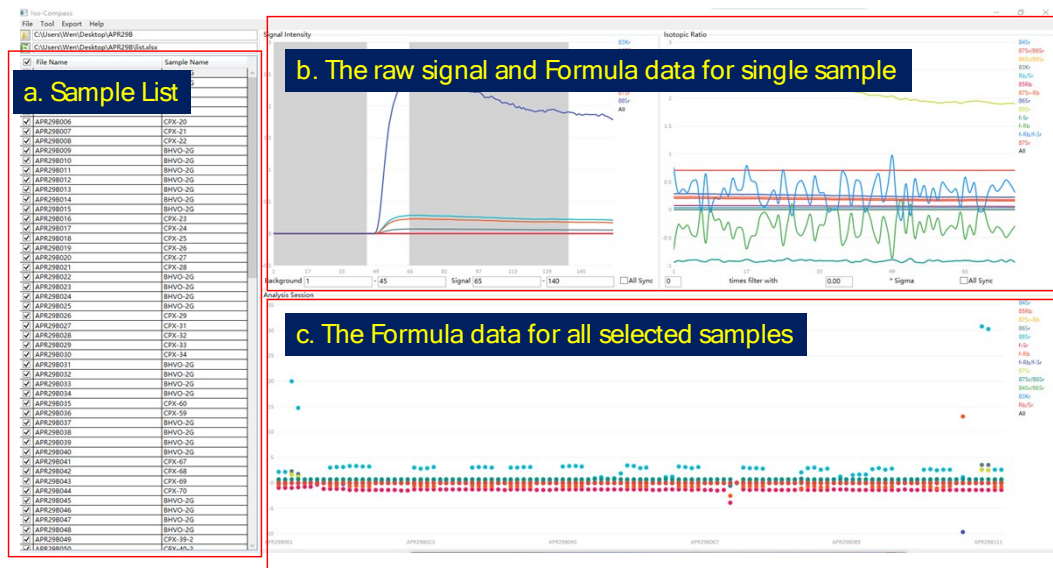

Figure 3.18 Data reduction interface

Tool—Option (Fig. 3.19).

The data reduction page includes three major modules:

(a) **Sample List.** The File Name of the Sample List is the name of all “.exp” files in the folder set by the user, and the Sample Name comes from the List file provided by the user. If the name of the “.exp” file does not correspond to the file name in the list, the Sample Name of the “.exp” file will be replaced with the File Name. You can select the file to be processed by ticking the small box in front of the file. Ticking the small box before File Name selects all data.

(b) After selecting a file, the two graphs on the upper right side display the signal distribution of the original sample data and all of the data written during the formula editing. In the original signal map, the two shaded areas are the background signal interval and data signal interval. You can directly select the signal interval manually by dragging the shadow or by entering the required signal interval below. One of the small boxes "All Sync" refers to whether global signal interval selection is performed.

The Formula chart includes a data filtering function. "X" times filtering with "x" sigma means the data culling operation is performed x times. In general, you can tick "All Sync" at the back and fill in "2" times filtering with "2" sigma, which means a 2-times 2x sigma discrete data deletion will be performed on the global sample.

(c) The formula data of all the selected samples are displayed in the lower right part to observe the global data.

You can also enter the Formula module from the data reduction page to make real-time changes to existing calibration methods: Tool—Option.

## Iso-Compass Isotope Data Reduction Software (Ver. 1.0)

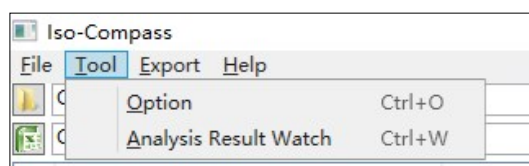

Figure 3.19 Data reduction interface: Tool toolbar

You can click the "Result Monitor" window in "Analysis Result Watch" in the Tool toolbar to view the correction data in real time. Only data with "Mean," "2SE," and "Count" ticked in the "Formula" module will be displayed in the "Result Monitor" window. The "Result Monitor" window also provides a "Remark" column to record problems with this data during processing.

| File Name | Sample  | h | Remark | 85Rb          | 88Sr      | F-Rb/F-Sr  | 87Sr/86Sr | 2SE          | 87Sr/86Sr-identity | 8i | 8i | 87Sr/86Sr | 8i | 84Sr/86Sr     | 2SE          | 84Sr/86Sr-identity | B- | B- | 84Sr/86Sr | B-            | 83Kr          | Rb/Sr |
|-----------|---------|---|--------|---------------|-----------|------------|-----------|--------------|--------------------|----|----|-----------|----|---------------|--------------|--------------------|----|----|-----------|---------------|---------------|-------|
| APR298001 | BHVO-2G |   |        | 0.06486332    | 2.1440955 | 0.3231608  | 0.7033682 | 0.0001183249 | STD                |    |    | 0.703469  |    | -0.000516201  | 7.195127E-05 | STD                |    |    | 0.05657   | 2.496731E-05  | 0.03471753    |       |
| APR298002 | BHVO-2G |   |        | 0.06504866    | 2.176949  | 0.3121229  | 0.7033635 | 0.0001424869 | STD                |    |    | 0.703469  |    | -0.0003789945 | 5.837175E-05 | STD                |    |    | 0.05657   | 3.113275E-05  | 0.03400284    |       |
| APR298003 | MADA    |   |        | -2.355541E-06 | 19.95479  |            | 0.7115045 | 2.452622E-05 |                    |    |    | 0.71187   |    | -0.0007795038 | 7.984404E-06 |                    |    |    | 0.05657   | 0.000363019   | 1.772265E-07  |       |
| APR298004 | MADA    |   |        | -2.828848E-05 | 14.74262  |            | 0.7113209 | 2.533096E-05 |                    |    |    | 0.71187   |    | -0.0011535    | 7.277403E-06 |                    |    |    | 0.05657   | 0.000243608   | -2.235785E-06 |       |
| APR298005 | CPX-19  |   |        | 1.986915E-05  | 0.1508927 |            | 0.7007066 | 0.0009414083 |                    |    |    |           |    | -0.002384551  | 0.0009283348 |                    |    |    |           | 5.342895E-06  | 0.000151381   |       |
| APR298006 | CPX-20  |   |        | 1.269785E-05  | 0.126803  |            | 0.7029727 | 0.001244867  |                    |    |    |           |    | -0.003509579  | 0.00114428   |                    |    |    |           | 4.336105E-06  | 0.00011118    |       |
| APR298007 | CPX-21  |   |        | 4.274479E-05  | 0.223751  |            | 0.6970199 | 0.0009104258 |                    |    |    |           |    | -0.002402878  | 0.000558824  |                    |    |    |           | 7.097415E-05  | 0.0002132001  |       |
| APR298008 | CPX-22  |   |        | 1.382162E-06  | 0.2914331 |            | 0.7023777 | 0.0005360674 |                    |    |    |           |    | -0.002733048  | 0.000533481  |                    |    |    |           | 3.515503E-05  | 4.994646E-06  |       |
| APR298009 | BHVO-2G |   |        | 0.08779617    | 2.995731  | 0.4416304  | 0.7032989 | 0.0001028384 | STD                |    |    | 0.703469  |    | -0.0004119181 | 4.527106E-05 | STD                |    |    | 0.05657   | 7.472655E-05  | 0.0333556     |       |
| APR298010 | BHVO-2G |   |        | 0.08853992    | 3.075718  | 0.4305672  | 0.7032927 | 9.220439E-05 | STD                |    |    | 0.703469  |    | -0.0004194441 | 4.016672E-05 | STD                |    |    | 0.05657   | 8.218033E-05  | 0.03295864    |       |
| APR298011 | BHVO-2G |   |        | 0.09245032    | 3.173063  | -0.1874822 | 0.7016424 | 0.0002118653 | STD                |    |    | 0.703469  |    | -0.0003249035 | 4.502598E-05 | STD                |    |    | 0.05657   | 0.0001483718  | 0.03333963    |       |
| APR298012 | BHVO-2G |   |        | 0.09514986    | 3.258861  | 0.5108176  | 0.7032414 | 0.0001047585 | STD                |    |    | 0.703469  |    | -0.0003176921 | 4.089286E-05 | STD                |    |    | 0.05657   | 9.693176E-05  | 0.03300579    |       |
| APR298013 | BHVO-2G |   |        | 0.09418997    | 3.294794  | 0.3980869  | 0.7029581 | 9.47917E-05  | STD                |    |    | 0.703469  |    | -0.0003099589 | 4.262365E-05 | STD                |    |    | 0.05657   | 0.0001117444  | 0.03236344    |       |
| APR298014 | BHVO-2G |   |        | 0.09337777    | 3.234706  | 0.4755601  | 0.7031345 | 8.778676E-05 | STD                |    |    | 0.703469  |    | -0.0003316534 | 4.891021E-05 | STD                |    |    | 0.05657   | 0.0001021852  | 0.03304981    |       |
| APR298015 | BHVO-2G |   |        | 0.09355755    | 3.243219  | 0.5078518  | 0.7032281 | 9.070105E-05 | STD                |    |    | 0.703469  |    | -0.0004053525 | 4.354357E-05 | STD                |    |    | 0.05657   | 9.513181E-05  | 0.03303544    |       |
| APR298016 | CPX-23  |   |        | -9.328214E-07 | 0.3431789 |            | 0.7029151 | 0.0004473072 |                    |    |    |           |    | -0.002363504  | 0.0003756967 |                    |    |    |           | 4.0654E-05    | -2.812726E-06 |       |
| APR298017 | CPX-24  |   |        | -6.436378E-06 | 0.3737927 |            | 0.702795  | 0.0004544759 |                    |    |    |           |    | -0.002107679  | 0.0004483183 |                    |    |    |           | 5.738718E-05  | -2.010463E-05 |       |
| APR298018 | CPX-25  |   |        | 1.104159E-05  | 0.3739302 |            | 0.7027369 | 0.000444851  |                    |    |    |           |    | -0.001423376  | 0.0004155483 |                    |    |    |           | 4.761478E-05  | 3.262663E-05  |       |
| APR298019 | CPX-26  |   |        | 2.562385E-05  | 0.3822149 |            | 0.7034827 | 0.0004287332 |                    |    |    |           |    | -0.001191474  | 0.0004083392 |                    |    |    |           | 4.455164E-05  | 1.700411E-05  |       |
| APR298020 | CPX-27  |   |        | 3.760124E-05  | 0.1444246 |            | 0.7034919 | 0.001081239  |                    |    |    |           |    | 0.0004596535  | 0.0008981477 |                    |    |    |           | 2.408598E-05  | 0.0002992585  |       |
| APR298021 | CPX-28  |   |        | 0.0003219305  | 0.166399  |            | 0.7022896 | 0.001012116  |                    |    |    |           |    | -0.0009495486 | 0.0007123657 |                    |    |    |           | -1.051029E-06 | 0.00227811    |       |
| APR298022 | BHVO-2G |   |        | 0.08459489    | 3.018714  | 0.463499   | 0.7033094 | 8.86388E-05  | STD                |    |    | 0.703469  |    | -0.0004580266 | 4.349639E-05 | STD                |    |    | 0.05657   | 5.416639E-05  | 0.03209191    |       |
| APR298023 | BHVO-2G |   |        | 0.08154732    | 3.841909  | 0.4737147  | 0.7033133 | 9.695248E-05 | STD                |    |    | 0.703469  |    | -0.000463477  | 4.906535E-05 | STD                |    |    | 0.05657   | 5.319213E-05  | 0.03284199    |       |

Figure 3.20 Data display interface after processing

The Export toolbar includes two data export modes: one is the ordinary "Export," which exports all of the data added in the "Export" module, while the other is the templated data export mode, "Formatted Export," Which uses an edited template to output the data. All exported data is saved in "Workspace (data save path)."

### 3.5 Saving data and exporting reports

All corrected parameters can be saved in "Save Session" in the File toolbar. The saved file can be read directly. However, the saved session can only be observed and cannot be edited. The file is saved in "Workspace (data save path)."

## Iso-Compass Isotope Data Reduction Software (Ver. 1.0)

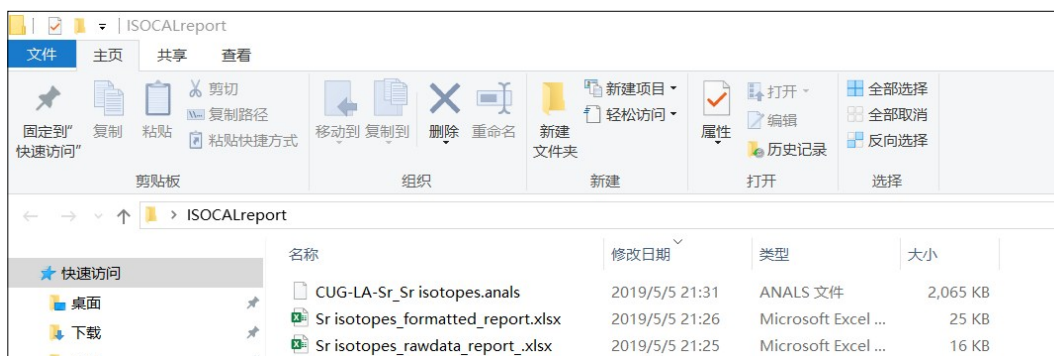

Figure 3.21 Saved session

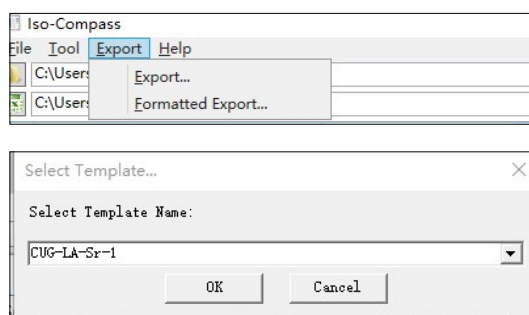

Figure 3.22 Formatted data export mode

# Iso-Compass Isotope Data Reduction Software (Ver. 1.0)

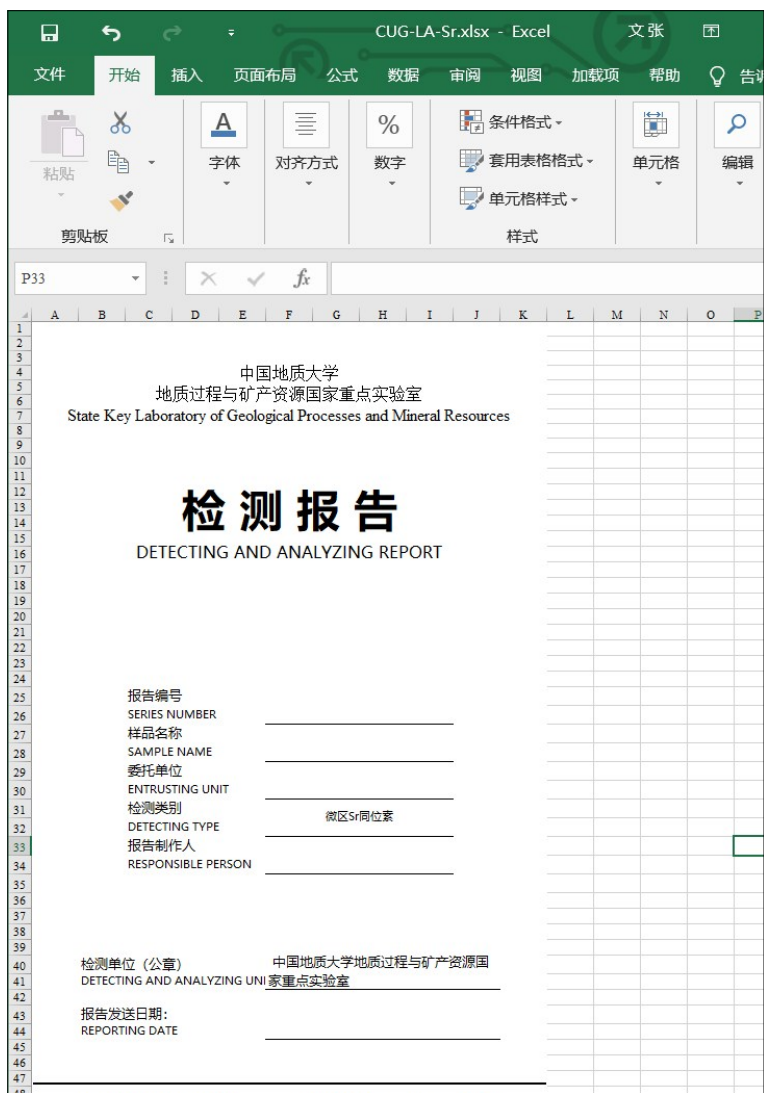

Figure 3.23 Formatted data export cover

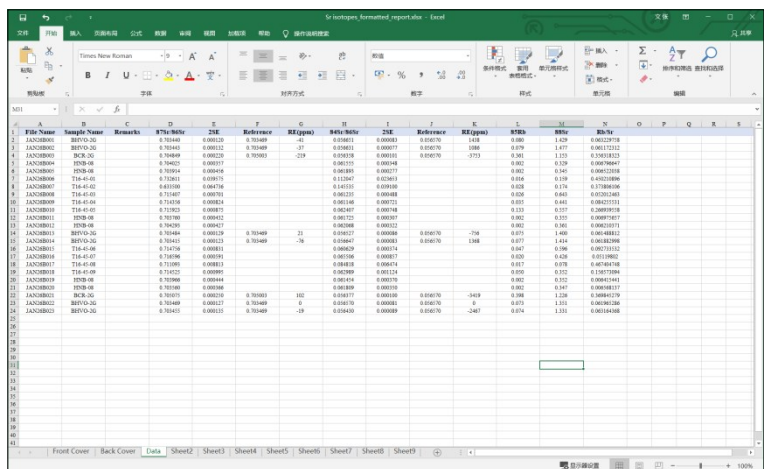

Figure 3.24 Formatted data export: data page

## 4. Laser MC-ICP-MS data reduction

### Example: zircon Hf isotope

The zircon Hf isotope is an important research object in micro-area isotope analysis. In this section, the zircon Hf isotope is used as an example to explain to the reader in detail how to use Iso-Compass to carry out micro-area isotope data reduction.

### 4.1 Data preparation

Prepare a zircon Hf isotope data folder, which contains raw data (".exp" format). All of the isotope signals to be tested are required to appear in the raw file. An edited list of data names in the form of APR27C\_LIST.xls is required.

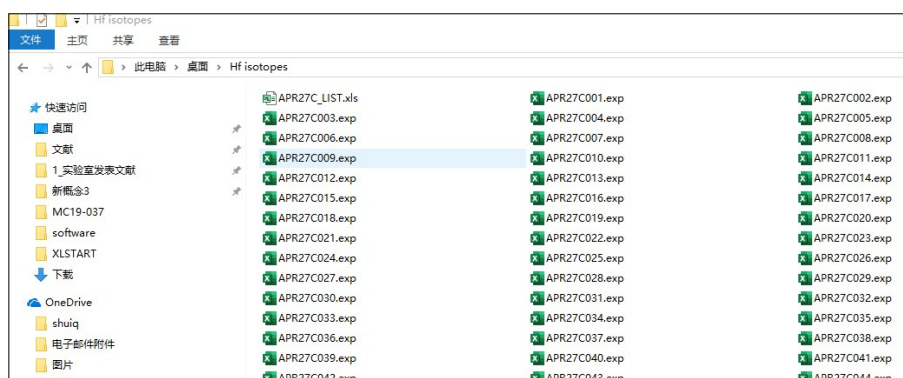

Figure 4.1 Raw data folder

### 4.2 Data import

Open the Iso-Compass software. Set the working folder path "Workspace," raw data folder path "Folder," file type "File type," and sample name list path "SampleList."



## Iso-Compass Isotope Data Reduction Software (Ver. 1.0)

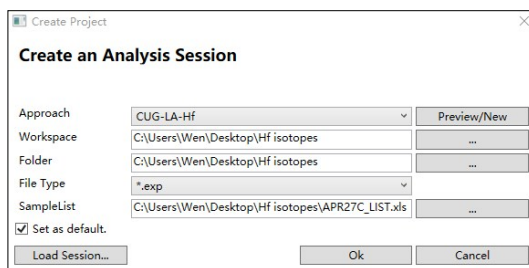

Figure 4.2 Data import

Select the Hf isotope data reduction method "Approach" – "CUG-LA-Hf." After selecting the method, click "Preview/New" to check the method.

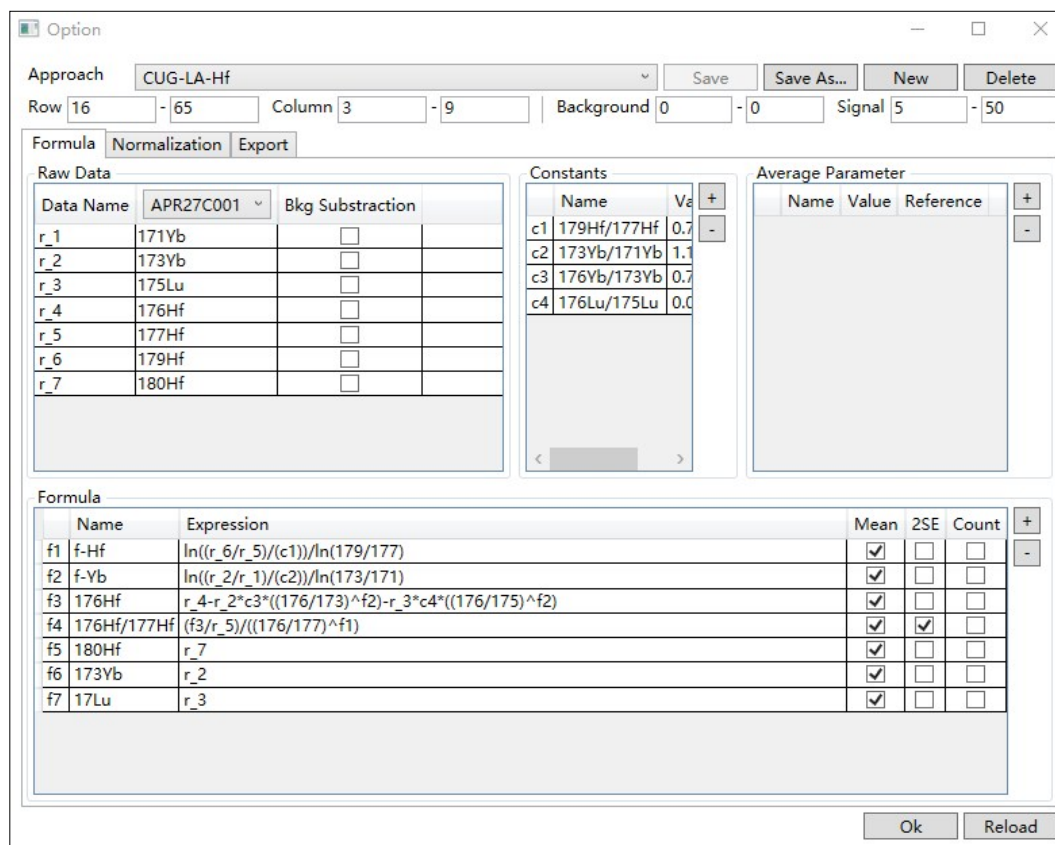

Figure 4.3 Checking data reduction

### 4.3 Data reduction

After confirming that the data reduction method is correct, click "OK" to enter the data reduction page.

On the data reduction page, you need to check the signal interval of each

## Iso-Compass Isotope Data Reduction Software (Ver. 1.0)

data point individually to verify the precision of the data and accuracy of the reference substance.

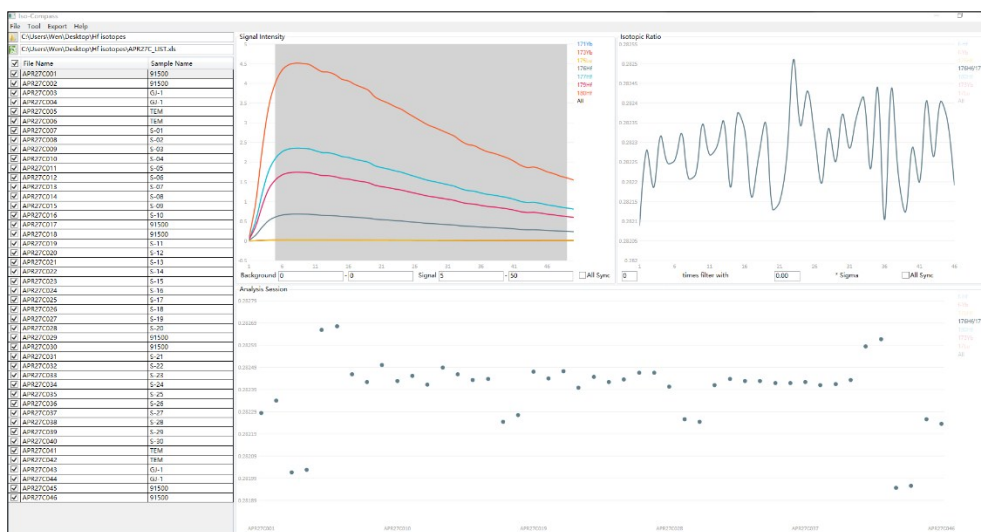

Figure 4.3 Raw data reduction interface

### 4.4 Data export

After completing the data check, select "Export" – "Formatted Export" and use the established data export template to export the currently processed data in a formatting scheme.

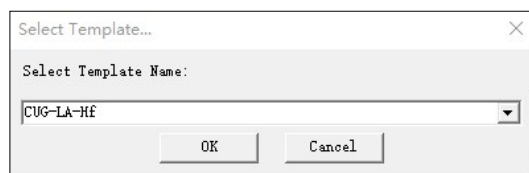

Figure 4.4 Data export

You can then obtain the final formatted data:

# Iso-Compass Isotope Data Reduction Software (Ver. 1.0)

| 中国地质大学<br>地质过程与矿产资源国家重点实验室<br>State Key Laboratory of Geological Processes and Mineral Resources                                 |                                                          | <table border="1" style="width: 100%; border-collapse: collapse;"> <thead> <tr> <th>File Name</th> <th>Sample Name</th> <th>Remarks</th> <th>176Hf/177Hf</th> <th>2SE</th> <th>Reference</th> <th>RE(ppm)</th> </tr> </thead> <tbody> <tr><td>APR27C001</td><td>91500</td><td></td><td>0.282295</td><td>0.000030</td><td>0.282302</td><td>-25</td></tr> <tr><td>APR27C002</td><td>91500</td><td></td><td>0.282343</td><td>0.000037</td><td>0.282302</td><td>144</td></tr> <tr><td>APR27C003</td><td>GJ-1</td><td></td><td>0.282041</td><td>0.000024</td><td>0.282013</td><td>101</td></tr> <tr><td>APR27C004</td><td>GJ-1</td><td></td><td>0.282031</td><td>0.000023</td><td>0.282013</td><td>63</td></tr> <tr><td>APR27C005</td><td>TEM</td><td></td><td>0.282684</td><td>0.000024</td><td>0.282686</td><td>-7</td></tr> <tr><td>APR27C006</td><td>TEM</td><td></td><td>0.282683</td><td>0.000027</td><td>0.282686</td><td>-12</td></tr> <tr><td>APR27C007</td><td>S-01</td><td></td><td>0.282478</td><td>0.000036</td><td></td><td></td></tr> <tr><td>APR27C008</td><td>S-02</td><td></td><td>0.282449</td><td>0.000037</td><td></td><td></td></tr> <tr><td>APR27C009</td><td>S-03</td><td></td><td>0.282533</td><td>0.000039</td><td></td><td></td></tr> <tr><td>APR27C010</td><td>S-04</td><td></td><td>0.282454</td><td>0.000045</td><td></td><td></td></tr> <tr><td>APR27C011</td><td>S-05</td><td></td><td>0.282489</td><td>0.000047</td><td></td><td></td></tr> <tr><td>APR27C012</td><td>S-06</td><td></td><td>0.282416</td><td>0.000039</td><td></td><td></td></tr> <tr><td>APR27C013</td><td>S-07</td><td></td><td>0.282493</td><td>0.000047</td><td></td><td></td></tr> <tr><td>APR27C014</td><td>S-08</td><td></td><td>0.282476</td><td>0.000038</td><td></td><td></td></tr> <tr><td>APR27C015</td><td>S-09</td><td></td><td>0.282443</td><td>0.000024</td><td></td><td></td></tr> <tr><td>APR27C016</td><td>S-10</td><td></td><td>0.282448</td><td>0.000042</td><td></td><td></td></tr> <tr><td>APR27C017</td><td>91500</td><td></td><td>0.282286</td><td>0.000024</td><td>0.282302</td><td>-58</td></tr> <tr><td>APR27C018</td><td>91500</td><td></td><td>0.282337</td><td>0.000031</td><td>0.282302</td><td>124</td></tr> <tr><td>APR27C019</td><td>S-11</td><td></td><td>0.282514</td><td>0.000037</td><td></td><td></td></tr> <tr><td>APR27C020</td><td>S-12</td><td></td><td>0.282489</td><td>0.000042</td><td></td><td></td></tr> <tr><td>APR27C021</td><td>S-13</td><td></td><td>0.282513</td><td>0.000037</td><td></td><td></td></tr> <tr><td>APR27C022</td><td>S-14</td><td></td><td>0.282435</td><td>0.000039</td><td></td><td></td></tr> <tr><td>APR27C023</td><td>S-15</td><td></td><td>0.282499</td><td>0.000042</td><td></td><td></td></tr> <tr><td>APR27C024</td><td>S-16</td><td></td><td>0.282466</td><td>0.000036</td><td></td><td></td></tr> <tr><td>APR27C025</td><td>S-17</td><td></td><td>0.282471</td><td>0.000036</td><td></td><td></td></tr> <tr><td>APR27C026</td><td>S-18</td><td></td><td>0.282506</td><td>0.000044</td><td></td><td></td></tr> <tr><td>APR27C027</td><td>S-19</td><td></td><td>0.282486</td><td>0.000034</td><td></td><td></td></tr> <tr><td>APR27C028</td><td>S-20</td><td></td><td>0.282435</td><td>0.000042</td><td></td><td></td></tr> <tr><td>APR27C029</td><td>91500</td><td></td><td>0.282316</td><td>0.000030</td><td>0.282302</td><td>49</td></tr> <tr><td>APR27C030</td><td>91500</td><td></td><td>0.282294</td><td>0.000030</td><td>0.282302</td><td>-29</td></tr> <tr><td>APR27C031</td><td>S-21</td><td></td><td>0.282471</td><td>0.000032</td><td></td><td></td></tr> <tr><td>APR27C032</td><td>S-22</td><td></td><td>0.282483</td><td>0.000035</td><td></td><td></td></tr> <tr><td>APR27C033</td><td>S-23</td><td></td><td>0.282494</td><td>0.000031</td><td></td><td></td></tr> <tr><td>APR27C034</td><td>S-24</td><td></td><td>0.282467</td><td>0.000037</td><td></td><td></td></tr> <tr><td>APR27C035</td><td>S-25</td><td></td><td>0.282470</td><td>0.000037</td><td></td><td></td></tr> <tr><td>APR27C036</td><td>S-26</td><td></td><td>0.282484</td><td>0.000043</td><td></td><td></td></tr> <tr><td>APR27C037</td><td>S-27</td><td></td><td>0.282489</td><td>0.000042</td><td></td><td></td></tr> </tbody> </table> |             |          |           |         |  | File Name | Sample Name | Remarks | 176Hf/177Hf | 2SE | Reference | RE(ppm) | APR27C001 | 91500 |  | 0.282295 | 0.000030 | 0.282302 | -25 | APR27C002 | 91500 |  | 0.282343 | 0.000037 | 0.282302 | 144 | APR27C003 | GJ-1 |  | 0.282041 | 0.000024 | 0.282013 | 101 | APR27C004 | GJ-1 |  | 0.282031 | 0.000023 | 0.282013 | 63 | APR27C005 | TEM |  | 0.282684 | 0.000024 | 0.282686 | -7 | APR27C006 | TEM |  | 0.282683 | 0.000027 | 0.282686 | -12 | APR27C007 | S-01 |  | 0.282478 | 0.000036 |  |  | APR27C008 | S-02 |  | 0.282449 | 0.000037 |  |  | APR27C009 | S-03 |  | 0.282533 | 0.000039 |  |  | APR27C010 | S-04 |  | 0.282454 | 0.000045 |  |  | APR27C011 | S-05 |  | 0.282489 | 0.000047 |  |  | APR27C012 | S-06 |  | 0.282416 | 0.000039 |  |  | APR27C013 | S-07 |  | 0.282493 | 0.000047 |  |  | APR27C014 | S-08 |  | 0.282476 | 0.000038 |  |  | APR27C015 | S-09 |  | 0.282443 | 0.000024 |  |  | APR27C016 | S-10 |  | 0.282448 | 0.000042 |  |  | APR27C017 | 91500 |  | 0.282286 | 0.000024 | 0.282302 | -58 | APR27C018 | 91500 |  | 0.282337 | 0.000031 | 0.282302 | 124 | APR27C019 | S-11 |  | 0.282514 | 0.000037 |  |  | APR27C020 | S-12 |  | 0.282489 | 0.000042 |  |  | APR27C021 | S-13 |  | 0.282513 | 0.000037 |  |  | APR27C022 | S-14 |  | 0.282435 | 0.000039 |  |  | APR27C023 | S-15 |  | 0.282499 | 0.000042 |  |  | APR27C024 | S-16 |  | 0.282466 | 0.000036 |  |  | APR27C025 | S-17 |  | 0.282471 | 0.000036 |  |  | APR27C026 | S-18 |  | 0.282506 | 0.000044 |  |  | APR27C027 | S-19 |  | 0.282486 | 0.000034 |  |  | APR27C028 | S-20 |  | 0.282435 | 0.000042 |  |  | APR27C029 | 91500 |  | 0.282316 | 0.000030 | 0.282302 | 49 | APR27C030 | 91500 |  | 0.282294 | 0.000030 | 0.282302 | -29 | APR27C031 | S-21 |  | 0.282471 | 0.000032 |  |  | APR27C032 | S-22 |  | 0.282483 | 0.000035 |  |  | APR27C033 | S-23 |  | 0.282494 | 0.000031 |  |  | APR27C034 | S-24 |  | 0.282467 | 0.000037 |  |  | APR27C035 | S-25 |  | 0.282470 | 0.000037 |  |  | APR27C036 | S-26 |  | 0.282484 | 0.000043 |  |  | APR27C037 | S-27 |  | 0.282489 | 0.000042 |  |  |
|----------------------------------------------------------------------------------------------------------------------------------|----------------------------------------------------------|------------------------------------------------------------------------------------------------------------------------------------------------------------------------------------------------------------------------------------------------------------------------------------------------------------------------------------------------------------------------------------------------------------------------------------------------------------------------------------------------------------------------------------------------------------------------------------------------------------------------------------------------------------------------------------------------------------------------------------------------------------------------------------------------------------------------------------------------------------------------------------------------------------------------------------------------------------------------------------------------------------------------------------------------------------------------------------------------------------------------------------------------------------------------------------------------------------------------------------------------------------------------------------------------------------------------------------------------------------------------------------------------------------------------------------------------------------------------------------------------------------------------------------------------------------------------------------------------------------------------------------------------------------------------------------------------------------------------------------------------------------------------------------------------------------------------------------------------------------------------------------------------------------------------------------------------------------------------------------------------------------------------------------------------------------------------------------------------------------------------------------------------------------------------------------------------------------------------------------------------------------------------------------------------------------------------------------------------------------------------------------------------------------------------------------------------------------------------------------------------------------------------------------------------------------------------------------------------------------------------------------------------------------------------------------------------------------------------------------------------------------------------------------------------------------------------------------------------------------------------------------------------------------------------------------------------------------------------------------------------------------------------------------------------------------------------------------------------------------------------------------------------------------------------------------------------------------------------------------------------------------------------------------------------------------------------------------------------------------------------------------------------------------------------------------------------------------------------------------------------------------------------------------------------------------------------------------------------------------------------------------------------------------------------------------------------------------------------------------------------------------------------------------------------------------------------------------------------------------------------------------------------------------------------------------------------------------------------------------------------------------------------------------------------------------------------------------------------------------------------------------------------------------------------------------------------------------------------------------------------------------------------------------------------------|-------------|----------|-----------|---------|--|-----------|-------------|---------|-------------|-----|-----------|---------|-----------|-------|--|----------|----------|----------|-----|-----------|-------|--|----------|----------|----------|-----|-----------|------|--|----------|----------|----------|-----|-----------|------|--|----------|----------|----------|----|-----------|-----|--|----------|----------|----------|----|-----------|-----|--|----------|----------|----------|-----|-----------|------|--|----------|----------|--|--|-----------|------|--|----------|----------|--|--|-----------|------|--|----------|----------|--|--|-----------|------|--|----------|----------|--|--|-----------|------|--|----------|----------|--|--|-----------|------|--|----------|----------|--|--|-----------|------|--|----------|----------|--|--|-----------|------|--|----------|----------|--|--|-----------|------|--|----------|----------|--|--|-----------|------|--|----------|----------|--|--|-----------|-------|--|----------|----------|----------|-----|-----------|-------|--|----------|----------|----------|-----|-----------|------|--|----------|----------|--|--|-----------|------|--|----------|----------|--|--|-----------|------|--|----------|----------|--|--|-----------|------|--|----------|----------|--|--|-----------|------|--|----------|----------|--|--|-----------|------|--|----------|----------|--|--|-----------|------|--|----------|----------|--|--|-----------|------|--|----------|----------|--|--|-----------|------|--|----------|----------|--|--|-----------|------|--|----------|----------|--|--|-----------|-------|--|----------|----------|----------|----|-----------|-------|--|----------|----------|----------|-----|-----------|------|--|----------|----------|--|--|-----------|------|--|----------|----------|--|--|-----------|------|--|----------|----------|--|--|-----------|------|--|----------|----------|--|--|-----------|------|--|----------|----------|--|--|-----------|------|--|----------|----------|--|--|-----------|------|--|----------|----------|--|--|
| File Name                                                                                                                        | Sample Name                                              | Remarks                                                                                                                                                                                                                                                                                                                                                                                                                                                                                                                                                                                                                                                                                                                                                                                                                                                                                                                                                                                                                                                                                                                                                                                                                                                                                                                                                                                                                                                                                                                                                                                                                                                                                                                                                                                                                                                                                                                                                                                                                                                                                                                                                                                                                                                                                                                                                                                                                                                                                                                                                                                                                                                                                                                                                                                                                                                                                                                                                                                                                                                                                                                                                                                                                                                                                                                                                                                                                                                                                                                                                                                                                                                                                                                                                                                                                                                                                                                                                                                                                                                                                                                                                                                                                                                                                              | 176Hf/177Hf | 2SE      | Reference | RE(ppm) |  |           |             |         |             |     |           |         |           |       |  |          |          |          |     |           |       |  |          |          |          |     |           |      |  |          |          |          |     |           |      |  |          |          |          |    |           |     |  |          |          |          |    |           |     |  |          |          |          |     |           |      |  |          |          |  |  |           |      |  |          |          |  |  |           |      |  |          |          |  |  |           |      |  |          |          |  |  |           |      |  |          |          |  |  |           |      |  |          |          |  |  |           |      |  |          |          |  |  |           |      |  |          |          |  |  |           |      |  |          |          |  |  |           |      |  |          |          |  |  |           |       |  |          |          |          |     |           |       |  |          |          |          |     |           |      |  |          |          |  |  |           |      |  |          |          |  |  |           |      |  |          |          |  |  |           |      |  |          |          |  |  |           |      |  |          |          |  |  |           |      |  |          |          |  |  |           |      |  |          |          |  |  |           |      |  |          |          |  |  |           |      |  |          |          |  |  |           |      |  |          |          |  |  |           |       |  |          |          |          |    |           |       |  |          |          |          |     |           |      |  |          |          |  |  |           |      |  |          |          |  |  |           |      |  |          |          |  |  |           |      |  |          |          |  |  |           |      |  |          |          |  |  |           |      |  |          |          |  |  |           |      |  |          |          |  |  |
| APR27C001                                                                                                                        | 91500                                                    |                                                                                                                                                                                                                                                                                                                                                                                                                                                                                                                                                                                                                                                                                                                                                                                                                                                                                                                                                                                                                                                                                                                                                                                                                                                                                                                                                                                                                                                                                                                                                                                                                                                                                                                                                                                                                                                                                                                                                                                                                                                                                                                                                                                                                                                                                                                                                                                                                                                                                                                                                                                                                                                                                                                                                                                                                                                                                                                                                                                                                                                                                                                                                                                                                                                                                                                                                                                                                                                                                                                                                                                                                                                                                                                                                                                                                                                                                                                                                                                                                                                                                                                                                                                                                                                                                                      | 0.282295    | 0.000030 | 0.282302  | -25     |  |           |             |         |             |     |           |         |           |       |  |          |          |          |     |           |       |  |          |          |          |     |           |      |  |          |          |          |     |           |      |  |          |          |          |    |           |     |  |          |          |          |    |           |     |  |          |          |          |     |           |      |  |          |          |  |  |           |      |  |          |          |  |  |           |      |  |          |          |  |  |           |      |  |          |          |  |  |           |      |  |          |          |  |  |           |      |  |          |          |  |  |           |      |  |          |          |  |  |           |      |  |          |          |  |  |           |      |  |          |          |  |  |           |      |  |          |          |  |  |           |       |  |          |          |          |     |           |       |  |          |          |          |     |           |      |  |          |          |  |  |           |      |  |          |          |  |  |           |      |  |          |          |  |  |           |      |  |          |          |  |  |           |      |  |          |          |  |  |           |      |  |          |          |  |  |           |      |  |          |          |  |  |           |      |  |          |          |  |  |           |      |  |          |          |  |  |           |      |  |          |          |  |  |           |       |  |          |          |          |    |           |       |  |          |          |          |     |           |      |  |          |          |  |  |           |      |  |          |          |  |  |           |      |  |          |          |  |  |           |      |  |          |          |  |  |           |      |  |          |          |  |  |           |      |  |          |          |  |  |           |      |  |          |          |  |  |
| APR27C002                                                                                                                        | 91500                                                    |                                                                                                                                                                                                                                                                                                                                                                                                                                                                                                                                                                                                                                                                                                                                                                                                                                                                                                                                                                                                                                                                                                                                                                                                                                                                                                                                                                                                                                                                                                                                                                                                                                                                                                                                                                                                                                                                                                                                                                                                                                                                                                                                                                                                                                                                                                                                                                                                                                                                                                                                                                                                                                                                                                                                                                                                                                                                                                                                                                                                                                                                                                                                                                                                                                                                                                                                                                                                                                                                                                                                                                                                                                                                                                                                                                                                                                                                                                                                                                                                                                                                                                                                                                                                                                                                                                      | 0.282343    | 0.000037 | 0.282302  | 144     |  |           |             |         |             |     |           |         |           |       |  |          |          |          |     |           |       |  |          |          |          |     |           |      |  |          |          |          |     |           |      |  |          |          |          |    |           |     |  |          |          |          |    |           |     |  |          |          |          |     |           |      |  |          |          |  |  |           |      |  |          |          |  |  |           |      |  |          |          |  |  |           |      |  |          |          |  |  |           |      |  |          |          |  |  |           |      |  |          |          |  |  |           |      |  |          |          |  |  |           |      |  |          |          |  |  |           |      |  |          |          |  |  |           |      |  |          |          |  |  |           |       |  |          |          |          |     |           |       |  |          |          |          |     |           |      |  |          |          |  |  |           |      |  |          |          |  |  |           |      |  |          |          |  |  |           |      |  |          |          |  |  |           |      |  |          |          |  |  |           |      |  |          |          |  |  |           |      |  |          |          |  |  |           |      |  |          |          |  |  |           |      |  |          |          |  |  |           |      |  |          |          |  |  |           |       |  |          |          |          |    |           |       |  |          |          |          |     |           |      |  |          |          |  |  |           |      |  |          |          |  |  |           |      |  |          |          |  |  |           |      |  |          |          |  |  |           |      |  |          |          |  |  |           |      |  |          |          |  |  |           |      |  |          |          |  |  |
| APR27C003                                                                                                                        | GJ-1                                                     |                                                                                                                                                                                                                                                                                                                                                                                                                                                                                                                                                                                                                                                                                                                                                                                                                                                                                                                                                                                                                                                                                                                                                                                                                                                                                                                                                                                                                                                                                                                                                                                                                                                                                                                                                                                                                                                                                                                                                                                                                                                                                                                                                                                                                                                                                                                                                                                                                                                                                                                                                                                                                                                                                                                                                                                                                                                                                                                                                                                                                                                                                                                                                                                                                                                                                                                                                                                                                                                                                                                                                                                                                                                                                                                                                                                                                                                                                                                                                                                                                                                                                                                                                                                                                                                                                                      | 0.282041    | 0.000024 | 0.282013  | 101     |  |           |             |         |             |     |           |         |           |       |  |          |          |          |     |           |       |  |          |          |          |     |           |      |  |          |          |          |     |           |      |  |          |          |          |    |           |     |  |          |          |          |    |           |     |  |          |          |          |     |           |      |  |          |          |  |  |           |      |  |          |          |  |  |           |      |  |          |          |  |  |           |      |  |          |          |  |  |           |      |  |          |          |  |  |           |      |  |          |          |  |  |           |      |  |          |          |  |  |           |      |  |          |          |  |  |           |      |  |          |          |  |  |           |      |  |          |          |  |  |           |       |  |          |          |          |     |           |       |  |          |          |          |     |           |      |  |          |          |  |  |           |      |  |          |          |  |  |           |      |  |          |          |  |  |           |      |  |          |          |  |  |           |      |  |          |          |  |  |           |      |  |          |          |  |  |           |      |  |          |          |  |  |           |      |  |          |          |  |  |           |      |  |          |          |  |  |           |      |  |          |          |  |  |           |       |  |          |          |          |    |           |       |  |          |          |          |     |           |      |  |          |          |  |  |           |      |  |          |          |  |  |           |      |  |          |          |  |  |           |      |  |          |          |  |  |           |      |  |          |          |  |  |           |      |  |          |          |  |  |           |      |  |          |          |  |  |
| APR27C004                                                                                                                        | GJ-1                                                     |                                                                                                                                                                                                                                                                                                                                                                                                                                                                                                                                                                                                                                                                                                                                                                                                                                                                                                                                                                                                                                                                                                                                                                                                                                                                                                                                                                                                                                                                                                                                                                                                                                                                                                                                                                                                                                                                                                                                                                                                                                                                                                                                                                                                                                                                                                                                                                                                                                                                                                                                                                                                                                                                                                                                                                                                                                                                                                                                                                                                                                                                                                                                                                                                                                                                                                                                                                                                                                                                                                                                                                                                                                                                                                                                                                                                                                                                                                                                                                                                                                                                                                                                                                                                                                                                                                      | 0.282031    | 0.000023 | 0.282013  | 63      |  |           |             |         |             |     |           |         |           |       |  |          |          |          |     |           |       |  |          |          |          |     |           |      |  |          |          |          |     |           |      |  |          |          |          |    |           |     |  |          |          |          |    |           |     |  |          |          |          |     |           |      |  |          |          |  |  |           |      |  |          |          |  |  |           |      |  |          |          |  |  |           |      |  |          |          |  |  |           |      |  |          |          |  |  |           |      |  |          |          |  |  |           |      |  |          |          |  |  |           |      |  |          |          |  |  |           |      |  |          |          |  |  |           |      |  |          |          |  |  |           |       |  |          |          |          |     |           |       |  |          |          |          |     |           |      |  |          |          |  |  |           |      |  |          |          |  |  |           |      |  |          |          |  |  |           |      |  |          |          |  |  |           |      |  |          |          |  |  |           |      |  |          |          |  |  |           |      |  |          |          |  |  |           |      |  |          |          |  |  |           |      |  |          |          |  |  |           |      |  |          |          |  |  |           |       |  |          |          |          |    |           |       |  |          |          |          |     |           |      |  |          |          |  |  |           |      |  |          |          |  |  |           |      |  |          |          |  |  |           |      |  |          |          |  |  |           |      |  |          |          |  |  |           |      |  |          |          |  |  |           |      |  |          |          |  |  |
| APR27C005                                                                                                                        | TEM                                                      |                                                                                                                                                                                                                                                                                                                                                                                                                                                                                                                                                                                                                                                                                                                                                                                                                                                                                                                                                                                                                                                                                                                                                                                                                                                                                                                                                                                                                                                                                                                                                                                                                                                                                                                                                                                                                                                                                                                                                                                                                                                                                                                                                                                                                                                                                                                                                                                                                                                                                                                                                                                                                                                                                                                                                                                                                                                                                                                                                                                                                                                                                                                                                                                                                                                                                                                                                                                                                                                                                                                                                                                                                                                                                                                                                                                                                                                                                                                                                                                                                                                                                                                                                                                                                                                                                                      | 0.282684    | 0.000024 | 0.282686  | -7      |  |           |             |         |             |     |           |         |           |       |  |          |          |          |     |           |       |  |          |          |          |     |           |      |  |          |          |          |     |           |      |  |          |          |          |    |           |     |  |          |          |          |    |           |     |  |          |          |          |     |           |      |  |          |          |  |  |           |      |  |          |          |  |  |           |      |  |          |          |  |  |           |      |  |          |          |  |  |           |      |  |          |          |  |  |           |      |  |          |          |  |  |           |      |  |          |          |  |  |           |      |  |          |          |  |  |           |      |  |          |          |  |  |           |      |  |          |          |  |  |           |       |  |          |          |          |     |           |       |  |          |          |          |     |           |      |  |          |          |  |  |           |      |  |          |          |  |  |           |      |  |          |          |  |  |           |      |  |          |          |  |  |           |      |  |          |          |  |  |           |      |  |          |          |  |  |           |      |  |          |          |  |  |           |      |  |          |          |  |  |           |      |  |          |          |  |  |           |      |  |          |          |  |  |           |       |  |          |          |          |    |           |       |  |          |          |          |     |           |      |  |          |          |  |  |           |      |  |          |          |  |  |           |      |  |          |          |  |  |           |      |  |          |          |  |  |           |      |  |          |          |  |  |           |      |  |          |          |  |  |           |      |  |          |          |  |  |
| APR27C006                                                                                                                        | TEM                                                      |                                                                                                                                                                                                                                                                                                                                                                                                                                                                                                                                                                                                                                                                                                                                                                                                                                                                                                                                                                                                                                                                                                                                                                                                                                                                                                                                                                                                                                                                                                                                                                                                                                                                                                                                                                                                                                                                                                                                                                                                                                                                                                                                                                                                                                                                                                                                                                                                                                                                                                                                                                                                                                                                                                                                                                                                                                                                                                                                                                                                                                                                                                                                                                                                                                                                                                                                                                                                                                                                                                                                                                                                                                                                                                                                                                                                                                                                                                                                                                                                                                                                                                                                                                                                                                                                                                      | 0.282683    | 0.000027 | 0.282686  | -12     |  |           |             |         |             |     |           |         |           |       |  |          |          |          |     |           |       |  |          |          |          |     |           |      |  |          |          |          |     |           |      |  |          |          |          |    |           |     |  |          |          |          |    |           |     |  |          |          |          |     |           |      |  |          |          |  |  |           |      |  |          |          |  |  |           |      |  |          |          |  |  |           |      |  |          |          |  |  |           |      |  |          |          |  |  |           |      |  |          |          |  |  |           |      |  |          |          |  |  |           |      |  |          |          |  |  |           |      |  |          |          |  |  |           |      |  |          |          |  |  |           |       |  |          |          |          |     |           |       |  |          |          |          |     |           |      |  |          |          |  |  |           |      |  |          |          |  |  |           |      |  |          |          |  |  |           |      |  |          |          |  |  |           |      |  |          |          |  |  |           |      |  |          |          |  |  |           |      |  |          |          |  |  |           |      |  |          |          |  |  |           |      |  |          |          |  |  |           |      |  |          |          |  |  |           |       |  |          |          |          |    |           |       |  |          |          |          |     |           |      |  |          |          |  |  |           |      |  |          |          |  |  |           |      |  |          |          |  |  |           |      |  |          |          |  |  |           |      |  |          |          |  |  |           |      |  |          |          |  |  |           |      |  |          |          |  |  |
| APR27C007                                                                                                                        | S-01                                                     |                                                                                                                                                                                                                                                                                                                                                                                                                                                                                                                                                                                                                                                                                                                                                                                                                                                                                                                                                                                                                                                                                                                                                                                                                                                                                                                                                                                                                                                                                                                                                                                                                                                                                                                                                                                                                                                                                                                                                                                                                                                                                                                                                                                                                                                                                                                                                                                                                                                                                                                                                                                                                                                                                                                                                                                                                                                                                                                                                                                                                                                                                                                                                                                                                                                                                                                                                                                                                                                                                                                                                                                                                                                                                                                                                                                                                                                                                                                                                                                                                                                                                                                                                                                                                                                                                                      | 0.282478    | 0.000036 |           |         |  |           |             |         |             |     |           |         |           |       |  |          |          |          |     |           |       |  |          |          |          |     |           |      |  |          |          |          |     |           |      |  |          |          |          |    |           |     |  |          |          |          |    |           |     |  |          |          |          |     |           |      |  |          |          |  |  |           |      |  |          |          |  |  |           |      |  |          |          |  |  |           |      |  |          |          |  |  |           |      |  |          |          |  |  |           |      |  |          |          |  |  |           |      |  |          |          |  |  |           |      |  |          |          |  |  |           |      |  |          |          |  |  |           |      |  |          |          |  |  |           |       |  |          |          |          |     |           |       |  |          |          |          |     |           |      |  |          |          |  |  |           |      |  |          |          |  |  |           |      |  |          |          |  |  |           |      |  |          |          |  |  |           |      |  |          |          |  |  |           |      |  |          |          |  |  |           |      |  |          |          |  |  |           |      |  |          |          |  |  |           |      |  |          |          |  |  |           |      |  |          |          |  |  |           |       |  |          |          |          |    |           |       |  |          |          |          |     |           |      |  |          |          |  |  |           |      |  |          |          |  |  |           |      |  |          |          |  |  |           |      |  |          |          |  |  |           |      |  |          |          |  |  |           |      |  |          |          |  |  |           |      |  |          |          |  |  |
| APR27C008                                                                                                                        | S-02                                                     |                                                                                                                                                                                                                                                                                                                                                                                                                                                                                                                                                                                                                                                                                                                                                                                                                                                                                                                                                                                                                                                                                                                                                                                                                                                                                                                                                                                                                                                                                                                                                                                                                                                                                                                                                                                                                                                                                                                                                                                                                                                                                                                                                                                                                                                                                                                                                                                                                                                                                                                                                                                                                                                                                                                                                                                                                                                                                                                                                                                                                                                                                                                                                                                                                                                                                                                                                                                                                                                                                                                                                                                                                                                                                                                                                                                                                                                                                                                                                                                                                                                                                                                                                                                                                                                                                                      | 0.282449    | 0.000037 |           |         |  |           |             |         |             |     |           |         |           |       |  |          |          |          |     |           |       |  |          |          |          |     |           |      |  |          |          |          |     |           |      |  |          |          |          |    |           |     |  |          |          |          |    |           |     |  |          |          |          |     |           |      |  |          |          |  |  |           |      |  |          |          |  |  |           |      |  |          |          |  |  |           |      |  |          |          |  |  |           |      |  |          |          |  |  |           |      |  |          |          |  |  |           |      |  |          |          |  |  |           |      |  |          |          |  |  |           |      |  |          |          |  |  |           |      |  |          |          |  |  |           |       |  |          |          |          |     |           |       |  |          |          |          |     |           |      |  |          |          |  |  |           |      |  |          |          |  |  |           |      |  |          |          |  |  |           |      |  |          |          |  |  |           |      |  |          |          |  |  |           |      |  |          |          |  |  |           |      |  |          |          |  |  |           |      |  |          |          |  |  |           |      |  |          |          |  |  |           |      |  |          |          |  |  |           |       |  |          |          |          |    |           |       |  |          |          |          |     |           |      |  |          |          |  |  |           |      |  |          |          |  |  |           |      |  |          |          |  |  |           |      |  |          |          |  |  |           |      |  |          |          |  |  |           |      |  |          |          |  |  |           |      |  |          |          |  |  |
| APR27C009                                                                                                                        | S-03                                                     |                                                                                                                                                                                                                                                                                                                                                                                                                                                                                                                                                                                                                                                                                                                                                                                                                                                                                                                                                                                                                                                                                                                                                                                                                                                                                                                                                                                                                                                                                                                                                                                                                                                                                                                                                                                                                                                                                                                                                                                                                                                                                                                                                                                                                                                                                                                                                                                                                                                                                                                                                                                                                                                                                                                                                                                                                                                                                                                                                                                                                                                                                                                                                                                                                                                                                                                                                                                                                                                                                                                                                                                                                                                                                                                                                                                                                                                                                                                                                                                                                                                                                                                                                                                                                                                                                                      | 0.282533    | 0.000039 |           |         |  |           |             |         |             |     |           |         |           |       |  |          |          |          |     |           |       |  |          |          |          |     |           |      |  |          |          |          |     |           |      |  |          |          |          |    |           |     |  |          |          |          |    |           |     |  |          |          |          |     |           |      |  |          |          |  |  |           |      |  |          |          |  |  |           |      |  |          |          |  |  |           |      |  |          |          |  |  |           |      |  |          |          |  |  |           |      |  |          |          |  |  |           |      |  |          |          |  |  |           |      |  |          |          |  |  |           |      |  |          |          |  |  |           |      |  |          |          |  |  |           |       |  |          |          |          |     |           |       |  |          |          |          |     |           |      |  |          |          |  |  |           |      |  |          |          |  |  |           |      |  |          |          |  |  |           |      |  |          |          |  |  |           |      |  |          |          |  |  |           |      |  |          |          |  |  |           |      |  |          |          |  |  |           |      |  |          |          |  |  |           |      |  |          |          |  |  |           |      |  |          |          |  |  |           |       |  |          |          |          |    |           |       |  |          |          |          |     |           |      |  |          |          |  |  |           |      |  |          |          |  |  |           |      |  |          |          |  |  |           |      |  |          |          |  |  |           |      |  |          |          |  |  |           |      |  |          |          |  |  |           |      |  |          |          |  |  |
| APR27C010                                                                                                                        | S-04                                                     |                                                                                                                                                                                                                                                                                                                                                                                                                                                                                                                                                                                                                                                                                                                                                                                                                                                                                                                                                                                                                                                                                                                                                                                                                                                                                                                                                                                                                                                                                                                                                                                                                                                                                                                                                                                                                                                                                                                                                                                                                                                                                                                                                                                                                                                                                                                                                                                                                                                                                                                                                                                                                                                                                                                                                                                                                                                                                                                                                                                                                                                                                                                                                                                                                                                                                                                                                                                                                                                                                                                                                                                                                                                                                                                                                                                                                                                                                                                                                                                                                                                                                                                                                                                                                                                                                                      | 0.282454    | 0.000045 |           |         |  |           |             |         |             |     |           |         |           |       |  |          |          |          |     |           |       |  |          |          |          |     |           |      |  |          |          |          |     |           |      |  |          |          |          |    |           |     |  |          |          |          |    |           |     |  |          |          |          |     |           |      |  |          |          |  |  |           |      |  |          |          |  |  |           |      |  |          |          |  |  |           |      |  |          |          |  |  |           |      |  |          |          |  |  |           |      |  |          |          |  |  |           |      |  |          |          |  |  |           |      |  |          |          |  |  |           |      |  |          |          |  |  |           |      |  |          |          |  |  |           |       |  |          |          |          |     |           |       |  |          |          |          |     |           |      |  |          |          |  |  |           |      |  |          |          |  |  |           |      |  |          |          |  |  |           |      |  |          |          |  |  |           |      |  |          |          |  |  |           |      |  |          |          |  |  |           |      |  |          |          |  |  |           |      |  |          |          |  |  |           |      |  |          |          |  |  |           |      |  |          |          |  |  |           |       |  |          |          |          |    |           |       |  |          |          |          |     |           |      |  |          |          |  |  |           |      |  |          |          |  |  |           |      |  |          |          |  |  |           |      |  |          |          |  |  |           |      |  |          |          |  |  |           |      |  |          |          |  |  |           |      |  |          |          |  |  |
| APR27C011                                                                                                                        | S-05                                                     |                                                                                                                                                                                                                                                                                                                                                                                                                                                                                                                                                                                                                                                                                                                                                                                                                                                                                                                                                                                                                                                                                                                                                                                                                                                                                                                                                                                                                                                                                                                                                                                                                                                                                                                                                                                                                                                                                                                                                                                                                                                                                                                                                                                                                                                                                                                                                                                                                                                                                                                                                                                                                                                                                                                                                                                                                                                                                                                                                                                                                                                                                                                                                                                                                                                                                                                                                                                                                                                                                                                                                                                                                                                                                                                                                                                                                                                                                                                                                                                                                                                                                                                                                                                                                                                                                                      | 0.282489    | 0.000047 |           |         |  |           |             |         |             |     |           |         |           |       |  |          |          |          |     |           |       |  |          |          |          |     |           |      |  |          |          |          |     |           |      |  |          |          |          |    |           |     |  |          |          |          |    |           |     |  |          |          |          |     |           |      |  |          |          |  |  |           |      |  |          |          |  |  |           |      |  |          |          |  |  |           |      |  |          |          |  |  |           |      |  |          |          |  |  |           |      |  |          |          |  |  |           |      |  |          |          |  |  |           |      |  |          |          |  |  |           |      |  |          |          |  |  |           |      |  |          |          |  |  |           |       |  |          |          |          |     |           |       |  |          |          |          |     |           |      |  |          |          |  |  |           |      |  |          |          |  |  |           |      |  |          |          |  |  |           |      |  |          |          |  |  |           |      |  |          |          |  |  |           |      |  |          |          |  |  |           |      |  |          |          |  |  |           |      |  |          |          |  |  |           |      |  |          |          |  |  |           |      |  |          |          |  |  |           |       |  |          |          |          |    |           |       |  |          |          |          |     |           |      |  |          |          |  |  |           |      |  |          |          |  |  |           |      |  |          |          |  |  |           |      |  |          |          |  |  |           |      |  |          |          |  |  |           |      |  |          |          |  |  |           |      |  |          |          |  |  |
| APR27C012                                                                                                                        | S-06                                                     |                                                                                                                                                                                                                                                                                                                                                                                                                                                                                                                                                                                                                                                                                                                                                                                                                                                                                                                                                                                                                                                                                                                                                                                                                                                                                                                                                                                                                                                                                                                                                                                                                                                                                                                                                                                                                                                                                                                                                                                                                                                                                                                                                                                                                                                                                                                                                                                                                                                                                                                                                                                                                                                                                                                                                                                                                                                                                                                                                                                                                                                                                                                                                                                                                                                                                                                                                                                                                                                                                                                                                                                                                                                                                                                                                                                                                                                                                                                                                                                                                                                                                                                                                                                                                                                                                                      | 0.282416    | 0.000039 |           |         |  |           |             |         |             |     |           |         |           |       |  |          |          |          |     |           |       |  |          |          |          |     |           |      |  |          |          |          |     |           |      |  |          |          |          |    |           |     |  |          |          |          |    |           |     |  |          |          |          |     |           |      |  |          |          |  |  |           |      |  |          |          |  |  |           |      |  |          |          |  |  |           |      |  |          |          |  |  |           |      |  |          |          |  |  |           |      |  |          |          |  |  |           |      |  |          |          |  |  |           |      |  |          |          |  |  |           |      |  |          |          |  |  |           |      |  |          |          |  |  |           |       |  |          |          |          |     |           |       |  |          |          |          |     |           |      |  |          |          |  |  |           |      |  |          |          |  |  |           |      |  |          |          |  |  |           |      |  |          |          |  |  |           |      |  |          |          |  |  |           |      |  |          |          |  |  |           |      |  |          |          |  |  |           |      |  |          |          |  |  |           |      |  |          |          |  |  |           |      |  |          |          |  |  |           |       |  |          |          |          |    |           |       |  |          |          |          |     |           |      |  |          |          |  |  |           |      |  |          |          |  |  |           |      |  |          |          |  |  |           |      |  |          |          |  |  |           |      |  |          |          |  |  |           |      |  |          |          |  |  |           |      |  |          |          |  |  |
| APR27C013                                                                                                                        | S-07                                                     |                                                                                                                                                                                                                                                                                                                                                                                                                                                                                                                                                                                                                                                                                                                                                                                                                                                                                                                                                                                                                                                                                                                                                                                                                                                                                                                                                                                                                                                                                                                                                                                                                                                                                                                                                                                                                                                                                                                                                                                                                                                                                                                                                                                                                                                                                                                                                                                                                                                                                                                                                                                                                                                                                                                                                                                                                                                                                                                                                                                                                                                                                                                                                                                                                                                                                                                                                                                                                                                                                                                                                                                                                                                                                                                                                                                                                                                                                                                                                                                                                                                                                                                                                                                                                                                                                                      | 0.282493    | 0.000047 |           |         |  |           |             |         |             |     |           |         |           |       |  |          |          |          |     |           |       |  |          |          |          |     |           |      |  |          |          |          |     |           |      |  |          |          |          |    |           |     |  |          |          |          |    |           |     |  |          |          |          |     |           |      |  |          |          |  |  |           |      |  |          |          |  |  |           |      |  |          |          |  |  |           |      |  |          |          |  |  |           |      |  |          |          |  |  |           |      |  |          |          |  |  |           |      |  |          |          |  |  |           |      |  |          |          |  |  |           |      |  |          |          |  |  |           |      |  |          |          |  |  |           |       |  |          |          |          |     |           |       |  |          |          |          |     |           |      |  |          |          |  |  |           |      |  |          |          |  |  |           |      |  |          |          |  |  |           |      |  |          |          |  |  |           |      |  |          |          |  |  |           |      |  |          |          |  |  |           |      |  |          |          |  |  |           |      |  |          |          |  |  |           |      |  |          |          |  |  |           |      |  |          |          |  |  |           |       |  |          |          |          |    |           |       |  |          |          |          |     |           |      |  |          |          |  |  |           |      |  |          |          |  |  |           |      |  |          |          |  |  |           |      |  |          |          |  |  |           |      |  |          |          |  |  |           |      |  |          |          |  |  |           |      |  |          |          |  |  |
| APR27C014                                                                                                                        | S-08                                                     |                                                                                                                                                                                                                                                                                                                                                                                                                                                                                                                                                                                                                                                                                                                                                                                                                                                                                                                                                                                                                                                                                                                                                                                                                                                                                                                                                                                                                                                                                                                                                                                                                                                                                                                                                                                                                                                                                                                                                                                                                                                                                                                                                                                                                                                                                                                                                                                                                                                                                                                                                                                                                                                                                                                                                                                                                                                                                                                                                                                                                                                                                                                                                                                                                                                                                                                                                                                                                                                                                                                                                                                                                                                                                                                                                                                                                                                                                                                                                                                                                                                                                                                                                                                                                                                                                                      | 0.282476    | 0.000038 |           |         |  |           |             |         |             |     |           |         |           |       |  |          |          |          |     |           |       |  |          |          |          |     |           |      |  |          |          |          |     |           |      |  |          |          |          |    |           |     |  |          |          |          |    |           |     |  |          |          |          |     |           |      |  |          |          |  |  |           |      |  |          |          |  |  |           |      |  |          |          |  |  |           |      |  |          |          |  |  |           |      |  |          |          |  |  |           |      |  |          |          |  |  |           |      |  |          |          |  |  |           |      |  |          |          |  |  |           |      |  |          |          |  |  |           |      |  |          |          |  |  |           |       |  |          |          |          |     |           |       |  |          |          |          |     |           |      |  |          |          |  |  |           |      |  |          |          |  |  |           |      |  |          |          |  |  |           |      |  |          |          |  |  |           |      |  |          |          |  |  |           |      |  |          |          |  |  |           |      |  |          |          |  |  |           |      |  |          |          |  |  |           |      |  |          |          |  |  |           |      |  |          |          |  |  |           |       |  |          |          |          |    |           |       |  |          |          |          |     |           |      |  |          |          |  |  |           |      |  |          |          |  |  |           |      |  |          |          |  |  |           |      |  |          |          |  |  |           |      |  |          |          |  |  |           |      |  |          |          |  |  |           |      |  |          |          |  |  |
| APR27C015                                                                                                                        | S-09                                                     |                                                                                                                                                                                                                                                                                                                                                                                                                                                                                                                                                                                                                                                                                                                                                                                                                                                                                                                                                                                                                                                                                                                                                                                                                                                                                                                                                                                                                                                                                                                                                                                                                                                                                                                                                                                                                                                                                                                                                                                                                                                                                                                                                                                                                                                                                                                                                                                                                                                                                                                                                                                                                                                                                                                                                                                                                                                                                                                                                                                                                                                                                                                                                                                                                                                                                                                                                                                                                                                                                                                                                                                                                                                                                                                                                                                                                                                                                                                                                                                                                                                                                                                                                                                                                                                                                                      | 0.282443    | 0.000024 |           |         |  |           |             |         |             |     |           |         |           |       |  |          |          |          |     |           |       |  |          |          |          |     |           |      |  |          |          |          |     |           |      |  |          |          |          |    |           |     |  |          |          |          |    |           |     |  |          |          |          |     |           |      |  |          |          |  |  |           |      |  |          |          |  |  |           |      |  |          |          |  |  |           |      |  |          |          |  |  |           |      |  |          |          |  |  |           |      |  |          |          |  |  |           |      |  |          |          |  |  |           |      |  |          |          |  |  |           |      |  |          |          |  |  |           |      |  |          |          |  |  |           |       |  |          |          |          |     |           |       |  |          |          |          |     |           |      |  |          |          |  |  |           |      |  |          |          |  |  |           |      |  |          |          |  |  |           |      |  |          |          |  |  |           |      |  |          |          |  |  |           |      |  |          |          |  |  |           |      |  |          |          |  |  |           |      |  |          |          |  |  |           |      |  |          |          |  |  |           |      |  |          |          |  |  |           |       |  |          |          |          |    |           |       |  |          |          |          |     |           |      |  |          |          |  |  |           |      |  |          |          |  |  |           |      |  |          |          |  |  |           |      |  |          |          |  |  |           |      |  |          |          |  |  |           |      |  |          |          |  |  |           |      |  |          |          |  |  |
| APR27C016                                                                                                                        | S-10                                                     |                                                                                                                                                                                                                                                                                                                                                                                                                                                                                                                                                                                                                                                                                                                                                                                                                                                                                                                                                                                                                                                                                                                                                                                                                                                                                                                                                                                                                                                                                                                                                                                                                                                                                                                                                                                                                                                                                                                                                                                                                                                                                                                                                                                                                                                                                                                                                                                                                                                                                                                                                                                                                                                                                                                                                                                                                                                                                                                                                                                                                                                                                                                                                                                                                                                                                                                                                                                                                                                                                                                                                                                                                                                                                                                                                                                                                                                                                                                                                                                                                                                                                                                                                                                                                                                                                                      | 0.282448    | 0.000042 |           |         |  |           |             |         |             |     |           |         |           |       |  |          |          |          |     |           |       |  |          |          |          |     |           |      |  |          |          |          |     |           |      |  |          |          |          |    |           |     |  |          |          |          |    |           |     |  |          |          |          |     |           |      |  |          |          |  |  |           |      |  |          |          |  |  |           |      |  |          |          |  |  |           |      |  |          |          |  |  |           |      |  |          |          |  |  |           |      |  |          |          |  |  |           |      |  |          |          |  |  |           |      |  |          |          |  |  |           |      |  |          |          |  |  |           |      |  |          |          |  |  |           |       |  |          |          |          |     |           |       |  |          |          |          |     |           |      |  |          |          |  |  |           |      |  |          |          |  |  |           |      |  |          |          |  |  |           |      |  |          |          |  |  |           |      |  |          |          |  |  |           |      |  |          |          |  |  |           |      |  |          |          |  |  |           |      |  |          |          |  |  |           |      |  |          |          |  |  |           |      |  |          |          |  |  |           |       |  |          |          |          |    |           |       |  |          |          |          |     |           |      |  |          |          |  |  |           |      |  |          |          |  |  |           |      |  |          |          |  |  |           |      |  |          |          |  |  |           |      |  |          |          |  |  |           |      |  |          |          |  |  |           |      |  |          |          |  |  |
| APR27C017                                                                                                                        | 91500                                                    |                                                                                                                                                                                                                                                                                                                                                                                                                                                                                                                                                                                                                                                                                                                                                                                                                                                                                                                                                                                                                                                                                                                                                                                                                                                                                                                                                                                                                                                                                                                                                                                                                                                                                                                                                                                                                                                                                                                                                                                                                                                                                                                                                                                                                                                                                                                                                                                                                                                                                                                                                                                                                                                                                                                                                                                                                                                                                                                                                                                                                                                                                                                                                                                                                                                                                                                                                                                                                                                                                                                                                                                                                                                                                                                                                                                                                                                                                                                                                                                                                                                                                                                                                                                                                                                                                                      | 0.282286    | 0.000024 | 0.282302  | -58     |  |           |             |         |             |     |           |         |           |       |  |          |          |          |     |           |       |  |          |          |          |     |           |      |  |          |          |          |     |           |      |  |          |          |          |    |           |     |  |          |          |          |    |           |     |  |          |          |          |     |           |      |  |          |          |  |  |           |      |  |          |          |  |  |           |      |  |          |          |  |  |           |      |  |          |          |  |  |           |      |  |          |          |  |  |           |      |  |          |          |  |  |           |      |  |          |          |  |  |           |      |  |          |          |  |  |           |      |  |          |          |  |  |           |      |  |          |          |  |  |           |       |  |          |          |          |     |           |       |  |          |          |          |     |           |      |  |          |          |  |  |           |      |  |          |          |  |  |           |      |  |          |          |  |  |           |      |  |          |          |  |  |           |      |  |          |          |  |  |           |      |  |          |          |  |  |           |      |  |          |          |  |  |           |      |  |          |          |  |  |           |      |  |          |          |  |  |           |      |  |          |          |  |  |           |       |  |          |          |          |    |           |       |  |          |          |          |     |           |      |  |          |          |  |  |           |      |  |          |          |  |  |           |      |  |          |          |  |  |           |      |  |          |          |  |  |           |      |  |          |          |  |  |           |      |  |          |          |  |  |           |      |  |          |          |  |  |
| APR27C018                                                                                                                        | 91500                                                    |                                                                                                                                                                                                                                                                                                                                                                                                                                                                                                                                                                                                                                                                                                                                                                                                                                                                                                                                                                                                                                                                                                                                                                                                                                                                                                                                                                                                                                                                                                                                                                                                                                                                                                                                                                                                                                                                                                                                                                                                                                                                                                                                                                                                                                                                                                                                                                                                                                                                                                                                                                                                                                                                                                                                                                                                                                                                                                                                                                                                                                                                                                                                                                                                                                                                                                                                                                                                                                                                                                                                                                                                                                                                                                                                                                                                                                                                                                                                                                                                                                                                                                                                                                                                                                                                                                      | 0.282337    | 0.000031 | 0.282302  | 124     |  |           |             |         |             |     |           |         |           |       |  |          |          |          |     |           |       |  |          |          |          |     |           |      |  |          |          |          |     |           |      |  |          |          |          |    |           |     |  |          |          |          |    |           |     |  |          |          |          |     |           |      |  |          |          |  |  |           |      |  |          |          |  |  |           |      |  |          |          |  |  |           |      |  |          |          |  |  |           |      |  |          |          |  |  |           |      |  |          |          |  |  |           |      |  |          |          |  |  |           |      |  |          |          |  |  |           |      |  |          |          |  |  |           |      |  |          |          |  |  |           |       |  |          |          |          |     |           |       |  |          |          |          |     |           |      |  |          |          |  |  |           |      |  |          |          |  |  |           |      |  |          |          |  |  |           |      |  |          |          |  |  |           |      |  |          |          |  |  |           |      |  |          |          |  |  |           |      |  |          |          |  |  |           |      |  |          |          |  |  |           |      |  |          |          |  |  |           |      |  |          |          |  |  |           |       |  |          |          |          |    |           |       |  |          |          |          |     |           |      |  |          |          |  |  |           |      |  |          |          |  |  |           |      |  |          |          |  |  |           |      |  |          |          |  |  |           |      |  |          |          |  |  |           |      |  |          |          |  |  |           |      |  |          |          |  |  |
| APR27C019                                                                                                                        | S-11                                                     |                                                                                                                                                                                                                                                                                                                                                                                                                                                                                                                                                                                                                                                                                                                                                                                                                                                                                                                                                                                                                                                                                                                                                                                                                                                                                                                                                                                                                                                                                                                                                                                                                                                                                                                                                                                                                                                                                                                                                                                                                                                                                                                                                                                                                                                                                                                                                                                                                                                                                                                                                                                                                                                                                                                                                                                                                                                                                                                                                                                                                                                                                                                                                                                                                                                                                                                                                                                                                                                                                                                                                                                                                                                                                                                                                                                                                                                                                                                                                                                                                                                                                                                                                                                                                                                                                                      | 0.282514    | 0.000037 |           |         |  |           |             |         |             |     |           |         |           |       |  |          |          |          |     |           |       |  |          |          |          |     |           |      |  |          |          |          |     |           |      |  |          |          |          |    |           |     |  |          |          |          |    |           |     |  |          |          |          |     |           |      |  |          |          |  |  |           |      |  |          |          |  |  |           |      |  |          |          |  |  |           |      |  |          |          |  |  |           |      |  |          |          |  |  |           |      |  |          |          |  |  |           |      |  |          |          |  |  |           |      |  |          |          |  |  |           |      |  |          |          |  |  |           |      |  |          |          |  |  |           |       |  |          |          |          |     |           |       |  |          |          |          |     |           |      |  |          |          |  |  |           |      |  |          |          |  |  |           |      |  |          |          |  |  |           |      |  |          |          |  |  |           |      |  |          |          |  |  |           |      |  |          |          |  |  |           |      |  |          |          |  |  |           |      |  |          |          |  |  |           |      |  |          |          |  |  |           |      |  |          |          |  |  |           |       |  |          |          |          |    |           |       |  |          |          |          |     |           |      |  |          |          |  |  |           |      |  |          |          |  |  |           |      |  |          |          |  |  |           |      |  |          |          |  |  |           |      |  |          |          |  |  |           |      |  |          |          |  |  |           |      |  |          |          |  |  |
| APR27C020                                                                                                                        | S-12                                                     |                                                                                                                                                                                                                                                                                                                                                                                                                                                                                                                                                                                                                                                                                                                                                                                                                                                                                                                                                                                                                                                                                                                                                                                                                                                                                                                                                                                                                                                                                                                                                                                                                                                                                                                                                                                                                                                                                                                                                                                                                                                                                                                                                                                                                                                                                                                                                                                                                                                                                                                                                                                                                                                                                                                                                                                                                                                                                                                                                                                                                                                                                                                                                                                                                                                                                                                                                                                                                                                                                                                                                                                                                                                                                                                                                                                                                                                                                                                                                                                                                                                                                                                                                                                                                                                                                                      | 0.282489    | 0.000042 |           |         |  |           |             |         |             |     |           |         |           |       |  |          |          |          |     |           |       |  |          |          |          |     |           |      |  |          |          |          |     |           |      |  |          |          |          |    |           |     |  |          |          |          |    |           |     |  |          |          |          |     |           |      |  |          |          |  |  |           |      |  |          |          |  |  |           |      |  |          |          |  |  |           |      |  |          |          |  |  |           |      |  |          |          |  |  |           |      |  |          |          |  |  |           |      |  |          |          |  |  |           |      |  |          |          |  |  |           |      |  |          |          |  |  |           |      |  |          |          |  |  |           |       |  |          |          |          |     |           |       |  |          |          |          |     |           |      |  |          |          |  |  |           |      |  |          |          |  |  |           |      |  |          |          |  |  |           |      |  |          |          |  |  |           |      |  |          |          |  |  |           |      |  |          |          |  |  |           |      |  |          |          |  |  |           |      |  |          |          |  |  |           |      |  |          |          |  |  |           |      |  |          |          |  |  |           |       |  |          |          |          |    |           |       |  |          |          |          |     |           |      |  |          |          |  |  |           |      |  |          |          |  |  |           |      |  |          |          |  |  |           |      |  |          |          |  |  |           |      |  |          |          |  |  |           |      |  |          |          |  |  |           |      |  |          |          |  |  |
| APR27C021                                                                                                                        | S-13                                                     |                                                                                                                                                                                                                                                                                                                                                                                                                                                                                                                                                                                                                                                                                                                                                                                                                                                                                                                                                                                                                                                                                                                                                                                                                                                                                                                                                                                                                                                                                                                                                                                                                                                                                                                                                                                                                                                                                                                                                                                                                                                                                                                                                                                                                                                                                                                                                                                                                                                                                                                                                                                                                                                                                                                                                                                                                                                                                                                                                                                                                                                                                                                                                                                                                                                                                                                                                                                                                                                                                                                                                                                                                                                                                                                                                                                                                                                                                                                                                                                                                                                                                                                                                                                                                                                                                                      | 0.282513    | 0.000037 |           |         |  |           |             |         |             |     |           |         |           |       |  |          |          |          |     |           |       |  |          |          |          |     |           |      |  |          |          |          |     |           |      |  |          |          |          |    |           |     |  |          |          |          |    |           |     |  |          |          |          |     |           |      |  |          |          |  |  |           |      |  |          |          |  |  |           |      |  |          |          |  |  |           |      |  |          |          |  |  |           |      |  |          |          |  |  |           |      |  |          |          |  |  |           |      |  |          |          |  |  |           |      |  |          |          |  |  |           |      |  |          |          |  |  |           |      |  |          |          |  |  |           |       |  |          |          |          |     |           |       |  |          |          |          |     |           |      |  |          |          |  |  |           |      |  |          |          |  |  |           |      |  |          |          |  |  |           |      |  |          |          |  |  |           |      |  |          |          |  |  |           |      |  |          |          |  |  |           |      |  |          |          |  |  |           |      |  |          |          |  |  |           |      |  |          |          |  |  |           |      |  |          |          |  |  |           |       |  |          |          |          |    |           |       |  |          |          |          |     |           |      |  |          |          |  |  |           |      |  |          |          |  |  |           |      |  |          |          |  |  |           |      |  |          |          |  |  |           |      |  |          |          |  |  |           |      |  |          |          |  |  |           |      |  |          |          |  |  |
| APR27C022                                                                                                                        | S-14                                                     |                                                                                                                                                                                                                                                                                                                                                                                                                                                                                                                                                                                                                                                                                                                                                                                                                                                                                                                                                                                                                                                                                                                                                                                                                                                                                                                                                                                                                                                                                                                                                                                                                                                                                                                                                                                                                                                                                                                                                                                                                                                                                                                                                                                                                                                                                                                                                                                                                                                                                                                                                                                                                                                                                                                                                                                                                                                                                                                                                                                                                                                                                                                                                                                                                                                                                                                                                                                                                                                                                                                                                                                                                                                                                                                                                                                                                                                                                                                                                                                                                                                                                                                                                                                                                                                                                                      | 0.282435    | 0.000039 |           |         |  |           |             |         |             |     |           |         |           |       |  |          |          |          |     |           |       |  |          |          |          |     |           |      |  |          |          |          |     |           |      |  |          |          |          |    |           |     |  |          |          |          |    |           |     |  |          |          |          |     |           |      |  |          |          |  |  |           |      |  |          |          |  |  |           |      |  |          |          |  |  |           |      |  |          |          |  |  |           |      |  |          |          |  |  |           |      |  |          |          |  |  |           |      |  |          |          |  |  |           |      |  |          |          |  |  |           |      |  |          |          |  |  |           |      |  |          |          |  |  |           |       |  |          |          |          |     |           |       |  |          |          |          |     |           |      |  |          |          |  |  |           |      |  |          |          |  |  |           |      |  |          |          |  |  |           |      |  |          |          |  |  |           |      |  |          |          |  |  |           |      |  |          |          |  |  |           |      |  |          |          |  |  |           |      |  |          |          |  |  |           |      |  |          |          |  |  |           |      |  |          |          |  |  |           |       |  |          |          |          |    |           |       |  |          |          |          |     |           |      |  |          |          |  |  |           |      |  |          |          |  |  |           |      |  |          |          |  |  |           |      |  |          |          |  |  |           |      |  |          |          |  |  |           |      |  |          |          |  |  |           |      |  |          |          |  |  |
| APR27C023                                                                                                                        | S-15                                                     |                                                                                                                                                                                                                                                                                                                                                                                                                                                                                                                                                                                                                                                                                                                                                                                                                                                                                                                                                                                                                                                                                                                                                                                                                                                                                                                                                                                                                                                                                                                                                                                                                                                                                                                                                                                                                                                                                                                                                                                                                                                                                                                                                                                                                                                                                                                                                                                                                                                                                                                                                                                                                                                                                                                                                                                                                                                                                                                                                                                                                                                                                                                                                                                                                                                                                                                                                                                                                                                                                                                                                                                                                                                                                                                                                                                                                                                                                                                                                                                                                                                                                                                                                                                                                                                                                                      | 0.282499    | 0.000042 |           |         |  |           |             |         |             |     |           |         |           |       |  |          |          |          |     |           |       |  |          |          |          |     |           |      |  |          |          |          |     |           |      |  |          |          |          |    |           |     |  |          |          |          |    |           |     |  |          |          |          |     |           |      |  |          |          |  |  |           |      |  |          |          |  |  |           |      |  |          |          |  |  |           |      |  |          |          |  |  |           |      |  |          |          |  |  |           |      |  |          |          |  |  |           |      |  |          |          |  |  |           |      |  |          |          |  |  |           |      |  |          |          |  |  |           |      |  |          |          |  |  |           |       |  |          |          |          |     |           |       |  |          |          |          |     |           |      |  |          |          |  |  |           |      |  |          |          |  |  |           |      |  |          |          |  |  |           |      |  |          |          |  |  |           |      |  |          |          |  |  |           |      |  |          |          |  |  |           |      |  |          |          |  |  |           |      |  |          |          |  |  |           |      |  |          |          |  |  |           |      |  |          |          |  |  |           |       |  |          |          |          |    |           |       |  |          |          |          |     |           |      |  |          |          |  |  |           |      |  |          |          |  |  |           |      |  |          |          |  |  |           |      |  |          |          |  |  |           |      |  |          |          |  |  |           |      |  |          |          |  |  |           |      |  |          |          |  |  |
| APR27C024                                                                                                                        | S-16                                                     |                                                                                                                                                                                                                                                                                                                                                                                                                                                                                                                                                                                                                                                                                                                                                                                                                                                                                                                                                                                                                                                                                                                                                                                                                                                                                                                                                                                                                                                                                                                                                                                                                                                                                                                                                                                                                                                                                                                                                                                                                                                                                                                                                                                                                                                                                                                                                                                                                                                                                                                                                                                                                                                                                                                                                                                                                                                                                                                                                                                                                                                                                                                                                                                                                                                                                                                                                                                                                                                                                                                                                                                                                                                                                                                                                                                                                                                                                                                                                                                                                                                                                                                                                                                                                                                                                                      | 0.282466    | 0.000036 |           |         |  |           |             |         |             |     |           |         |           |       |  |          |          |          |     |           |       |  |          |          |          |     |           |      |  |          |          |          |     |           |      |  |          |          |          |    |           |     |  |          |          |          |    |           |     |  |          |          |          |     |           |      |  |          |          |  |  |           |      |  |          |          |  |  |           |      |  |          |          |  |  |           |      |  |          |          |  |  |           |      |  |          |          |  |  |           |      |  |          |          |  |  |           |      |  |          |          |  |  |           |      |  |          |          |  |  |           |      |  |          |          |  |  |           |      |  |          |          |  |  |           |       |  |          |          |          |     |           |       |  |          |          |          |     |           |      |  |          |          |  |  |           |      |  |          |          |  |  |           |      |  |          |          |  |  |           |      |  |          |          |  |  |           |      |  |          |          |  |  |           |      |  |          |          |  |  |           |      |  |          |          |  |  |           |      |  |          |          |  |  |           |      |  |          |          |  |  |           |      |  |          |          |  |  |           |       |  |          |          |          |    |           |       |  |          |          |          |     |           |      |  |          |          |  |  |           |      |  |          |          |  |  |           |      |  |          |          |  |  |           |      |  |          |          |  |  |           |      |  |          |          |  |  |           |      |  |          |          |  |  |           |      |  |          |          |  |  |
| APR27C025                                                                                                                        | S-17                                                     |                                                                                                                                                                                                                                                                                                                                                                                                                                                                                                                                                                                                                                                                                                                                                                                                                                                                                                                                                                                                                                                                                                                                                                                                                                                                                                                                                                                                                                                                                                                                                                                                                                                                                                                                                                                                                                                                                                                                                                                                                                                                                                                                                                                                                                                                                                                                                                                                                                                                                                                                                                                                                                                                                                                                                                                                                                                                                                                                                                                                                                                                                                                                                                                                                                                                                                                                                                                                                                                                                                                                                                                                                                                                                                                                                                                                                                                                                                                                                                                                                                                                                                                                                                                                                                                                                                      | 0.282471    | 0.000036 |           |         |  |           |             |         |             |     |           |         |           |       |  |          |          |          |     |           |       |  |          |          |          |     |           |      |  |          |          |          |     |           |      |  |          |          |          |    |           |     |  |          |          |          |    |           |     |  |          |          |          |     |           |      |  |          |          |  |  |           |      |  |          |          |  |  |           |      |  |          |          |  |  |           |      |  |          |          |  |  |           |      |  |          |          |  |  |           |      |  |          |          |  |  |           |      |  |          |          |  |  |           |      |  |          |          |  |  |           |      |  |          |          |  |  |           |      |  |          |          |  |  |           |       |  |          |          |          |     |           |       |  |          |          |          |     |           |      |  |          |          |  |  |           |      |  |          |          |  |  |           |      |  |          |          |  |  |           |      |  |          |          |  |  |           |      |  |          |          |  |  |           |      |  |          |          |  |  |           |      |  |          |          |  |  |           |      |  |          |          |  |  |           |      |  |          |          |  |  |           |      |  |          |          |  |  |           |       |  |          |          |          |    |           |       |  |          |          |          |     |           |      |  |          |          |  |  |           |      |  |          |          |  |  |           |      |  |          |          |  |  |           |      |  |          |          |  |  |           |      |  |          |          |  |  |           |      |  |          |          |  |  |           |      |  |          |          |  |  |
| APR27C026                                                                                                                        | S-18                                                     |                                                                                                                                                                                                                                                                                                                                                                                                                                                                                                                                                                                                                                                                                                                                                                                                                                                                                                                                                                                                                                                                                                                                                                                                                                                                                                                                                                                                                                                                                                                                                                                                                                                                                                                                                                                                                                                                                                                                                                                                                                                                                                                                                                                                                                                                                                                                                                                                                                                                                                                                                                                                                                                                                                                                                                                                                                                                                                                                                                                                                                                                                                                                                                                                                                                                                                                                                                                                                                                                                                                                                                                                                                                                                                                                                                                                                                                                                                                                                                                                                                                                                                                                                                                                                                                                                                      | 0.282506    | 0.000044 |           |         |  |           |             |         |             |     |           |         |           |       |  |          |          |          |     |           |       |  |          |          |          |     |           |      |  |          |          |          |     |           |      |  |          |          |          |    |           |     |  |          |          |          |    |           |     |  |          |          |          |     |           |      |  |          |          |  |  |           |      |  |          |          |  |  |           |      |  |          |          |  |  |           |      |  |          |          |  |  |           |      |  |          |          |  |  |           |      |  |          |          |  |  |           |      |  |          |          |  |  |           |      |  |          |          |  |  |           |      |  |          |          |  |  |           |      |  |          |          |  |  |           |       |  |          |          |          |     |           |       |  |          |          |          |     |           |      |  |          |          |  |  |           |      |  |          |          |  |  |           |      |  |          |          |  |  |           |      |  |          |          |  |  |           |      |  |          |          |  |  |           |      |  |          |          |  |  |           |      |  |          |          |  |  |           |      |  |          |          |  |  |           |      |  |          |          |  |  |           |      |  |          |          |  |  |           |       |  |          |          |          |    |           |       |  |          |          |          |     |           |      |  |          |          |  |  |           |      |  |          |          |  |  |           |      |  |          |          |  |  |           |      |  |          |          |  |  |           |      |  |          |          |  |  |           |      |  |          |          |  |  |           |      |  |          |          |  |  |
| APR27C027                                                                                                                        | S-19                                                     |                                                                                                                                                                                                                                                                                                                                                                                                                                                                                                                                                                                                                                                                                                                                                                                                                                                                                                                                                                                                                                                                                                                                                                                                                                                                                                                                                                                                                                                                                                                                                                                                                                                                                                                                                                                                                                                                                                                                                                                                                                                                                                                                                                                                                                                                                                                                                                                                                                                                                                                                                                                                                                                                                                                                                                                                                                                                                                                                                                                                                                                                                                                                                                                                                                                                                                                                                                                                                                                                                                                                                                                                                                                                                                                                                                                                                                                                                                                                                                                                                                                                                                                                                                                                                                                                                                      | 0.282486    | 0.000034 |           |         |  |           |             |         |             |     |           |         |           |       |  |          |          |          |     |           |       |  |          |          |          |     |           |      |  |          |          |          |     |           |      |  |          |          |          |    |           |     |  |          |          |          |    |           |     |  |          |          |          |     |           |      |  |          |          |  |  |           |      |  |          |          |  |  |           |      |  |          |          |  |  |           |      |  |          |          |  |  |           |      |  |          |          |  |  |           |      |  |          |          |  |  |           |      |  |          |          |  |  |           |      |  |          |          |  |  |           |      |  |          |          |  |  |           |      |  |          |          |  |  |           |       |  |          |          |          |     |           |       |  |          |          |          |     |           |      |  |          |          |  |  |           |      |  |          |          |  |  |           |      |  |          |          |  |  |           |      |  |          |          |  |  |           |      |  |          |          |  |  |           |      |  |          |          |  |  |           |      |  |          |          |  |  |           |      |  |          |          |  |  |           |      |  |          |          |  |  |           |      |  |          |          |  |  |           |       |  |          |          |          |    |           |       |  |          |          |          |     |           |      |  |          |          |  |  |           |      |  |          |          |  |  |           |      |  |          |          |  |  |           |      |  |          |          |  |  |           |      |  |          |          |  |  |           |      |  |          |          |  |  |           |      |  |          |          |  |  |
| APR27C028                                                                                                                        | S-20                                                     |                                                                                                                                                                                                                                                                                                                                                                                                                                                                                                                                                                                                                                                                                                                                                                                                                                                                                                                                                                                                                                                                                                                                                                                                                                                                                                                                                                                                                                                                                                                                                                                                                                                                                                                                                                                                                                                                                                                                                                                                                                                                                                                                                                                                                                                                                                                                                                                                                                                                                                                                                                                                                                                                                                                                                                                                                                                                                                                                                                                                                                                                                                                                                                                                                                                                                                                                                                                                                                                                                                                                                                                                                                                                                                                                                                                                                                                                                                                                                                                                                                                                                                                                                                                                                                                                                                      | 0.282435    | 0.000042 |           |         |  |           |             |         |             |     |           |         |           |       |  |          |          |          |     |           |       |  |          |          |          |     |           |      |  |          |          |          |     |           |      |  |          |          |          |    |           |     |  |          |          |          |    |           |     |  |          |          |          |     |           |      |  |          |          |  |  |           |      |  |          |          |  |  |           |      |  |          |          |  |  |           |      |  |          |          |  |  |           |      |  |          |          |  |  |           |      |  |          |          |  |  |           |      |  |          |          |  |  |           |      |  |          |          |  |  |           |      |  |          |          |  |  |           |      |  |          |          |  |  |           |       |  |          |          |          |     |           |       |  |          |          |          |     |           |      |  |          |          |  |  |           |      |  |          |          |  |  |           |      |  |          |          |  |  |           |      |  |          |          |  |  |           |      |  |          |          |  |  |           |      |  |          |          |  |  |           |      |  |          |          |  |  |           |      |  |          |          |  |  |           |      |  |          |          |  |  |           |      |  |          |          |  |  |           |       |  |          |          |          |    |           |       |  |          |          |          |     |           |      |  |          |          |  |  |           |      |  |          |          |  |  |           |      |  |          |          |  |  |           |      |  |          |          |  |  |           |      |  |          |          |  |  |           |      |  |          |          |  |  |           |      |  |          |          |  |  |
| APR27C029                                                                                                                        | 91500                                                    |                                                                                                                                                                                                                                                                                                                                                                                                                                                                                                                                                                                                                                                                                                                                                                                                                                                                                                                                                                                                                                                                                                                                                                                                                                                                                                                                                                                                                                                                                                                                                                                                                                                                                                                                                                                                                                                                                                                                                                                                                                                                                                                                                                                                                                                                                                                                                                                                                                                                                                                                                                                                                                                                                                                                                                                                                                                                                                                                                                                                                                                                                                                                                                                                                                                                                                                                                                                                                                                                                                                                                                                                                                                                                                                                                                                                                                                                                                                                                                                                                                                                                                                                                                                                                                                                                                      | 0.282316    | 0.000030 | 0.282302  | 49      |  |           |             |         |             |     |           |         |           |       |  |          |          |          |     |           |       |  |          |          |          |     |           |      |  |          |          |          |     |           |      |  |          |          |          |    |           |     |  |          |          |          |    |           |     |  |          |          |          |     |           |      |  |          |          |  |  |           |      |  |          |          |  |  |           |      |  |          |          |  |  |           |      |  |          |          |  |  |           |      |  |          |          |  |  |           |      |  |          |          |  |  |           |      |  |          |          |  |  |           |      |  |          |          |  |  |           |      |  |          |          |  |  |           |      |  |          |          |  |  |           |       |  |          |          |          |     |           |       |  |          |          |          |     |           |      |  |          |          |  |  |           |      |  |          |          |  |  |           |      |  |          |          |  |  |           |      |  |          |          |  |  |           |      |  |          |          |  |  |           |      |  |          |          |  |  |           |      |  |          |          |  |  |           |      |  |          |          |  |  |           |      |  |          |          |  |  |           |      |  |          |          |  |  |           |       |  |          |          |          |    |           |       |  |          |          |          |     |           |      |  |          |          |  |  |           |      |  |          |          |  |  |           |      |  |          |          |  |  |           |      |  |          |          |  |  |           |      |  |          |          |  |  |           |      |  |          |          |  |  |           |      |  |          |          |  |  |
| APR27C030                                                                                                                        | 91500                                                    |                                                                                                                                                                                                                                                                                                                                                                                                                                                                                                                                                                                                                                                                                                                                                                                                                                                                                                                                                                                                                                                                                                                                                                                                                                                                                                                                                                                                                                                                                                                                                                                                                                                                                                                                                                                                                                                                                                                                                                                                                                                                                                                                                                                                                                                                                                                                                                                                                                                                                                                                                                                                                                                                                                                                                                                                                                                                                                                                                                                                                                                                                                                                                                                                                                                                                                                                                                                                                                                                                                                                                                                                                                                                                                                                                                                                                                                                                                                                                                                                                                                                                                                                                                                                                                                                                                      | 0.282294    | 0.000030 | 0.282302  | -29     |  |           |             |         |             |     |           |         |           |       |  |          |          |          |     |           |       |  |          |          |          |     |           |      |  |          |          |          |     |           |      |  |          |          |          |    |           |     |  |          |          |          |    |           |     |  |          |          |          |     |           |      |  |          |          |  |  |           |      |  |          |          |  |  |           |      |  |          |          |  |  |           |      |  |          |          |  |  |           |      |  |          |          |  |  |           |      |  |          |          |  |  |           |      |  |          |          |  |  |           |      |  |          |          |  |  |           |      |  |          |          |  |  |           |      |  |          |          |  |  |           |       |  |          |          |          |     |           |       |  |          |          |          |     |           |      |  |          |          |  |  |           |      |  |          |          |  |  |           |      |  |          |          |  |  |           |      |  |          |          |  |  |           |      |  |          |          |  |  |           |      |  |          |          |  |  |           |      |  |          |          |  |  |           |      |  |          |          |  |  |           |      |  |          |          |  |  |           |      |  |          |          |  |  |           |       |  |          |          |          |    |           |       |  |          |          |          |     |           |      |  |          |          |  |  |           |      |  |          |          |  |  |           |      |  |          |          |  |  |           |      |  |          |          |  |  |           |      |  |          |          |  |  |           |      |  |          |          |  |  |           |      |  |          |          |  |  |
| APR27C031                                                                                                                        | S-21                                                     |                                                                                                                                                                                                                                                                                                                                                                                                                                                                                                                                                                                                                                                                                                                                                                                                                                                                                                                                                                                                                                                                                                                                                                                                                                                                                                                                                                                                                                                                                                                                                                                                                                                                                                                                                                                                                                                                                                                                                                                                                                                                                                                                                                                                                                                                                                                                                                                                                                                                                                                                                                                                                                                                                                                                                                                                                                                                                                                                                                                                                                                                                                                                                                                                                                                                                                                                                                                                                                                                                                                                                                                                                                                                                                                                                                                                                                                                                                                                                                                                                                                                                                                                                                                                                                                                                                      | 0.282471    | 0.000032 |           |         |  |           |             |         |             |     |           |         |           |       |  |          |          |          |     |           |       |  |          |          |          |     |           |      |  |          |          |          |     |           |      |  |          |          |          |    |           |     |  |          |          |          |    |           |     |  |          |          |          |     |           |      |  |          |          |  |  |           |      |  |          |          |  |  |           |      |  |          |          |  |  |           |      |  |          |          |  |  |           |      |  |          |          |  |  |           |      |  |          |          |  |  |           |      |  |          |          |  |  |           |      |  |          |          |  |  |           |      |  |          |          |  |  |           |      |  |          |          |  |  |           |       |  |          |          |          |     |           |       |  |          |          |          |     |           |      |  |          |          |  |  |           |      |  |          |          |  |  |           |      |  |          |          |  |  |           |      |  |          |          |  |  |           |      |  |          |          |  |  |           |      |  |          |          |  |  |           |      |  |          |          |  |  |           |      |  |          |          |  |  |           |      |  |          |          |  |  |           |      |  |          |          |  |  |           |       |  |          |          |          |    |           |       |  |          |          |          |     |           |      |  |          |          |  |  |           |      |  |          |          |  |  |           |      |  |          |          |  |  |           |      |  |          |          |  |  |           |      |  |          |          |  |  |           |      |  |          |          |  |  |           |      |  |          |          |  |  |
| APR27C032                                                                                                                        | S-22                                                     |                                                                                                                                                                                                                                                                                                                                                                                                                                                                                                                                                                                                                                                                                                                                                                                                                                                                                                                                                                                                                                                                                                                                                                                                                                                                                                                                                                                                                                                                                                                                                                                                                                                                                                                                                                                                                                                                                                                                                                                                                                                                                                                                                                                                                                                                                                                                                                                                                                                                                                                                                                                                                                                                                                                                                                                                                                                                                                                                                                                                                                                                                                                                                                                                                                                                                                                                                                                                                                                                                                                                                                                                                                                                                                                                                                                                                                                                                                                                                                                                                                                                                                                                                                                                                                                                                                      | 0.282483    | 0.000035 |           |         |  |           |             |         |             |     |           |         |           |       |  |          |          |          |     |           |       |  |          |          |          |     |           |      |  |          |          |          |     |           |      |  |          |          |          |    |           |     |  |          |          |          |    |           |     |  |          |          |          |     |           |      |  |          |          |  |  |           |      |  |          |          |  |  |           |      |  |          |          |  |  |           |      |  |          |          |  |  |           |      |  |          |          |  |  |           |      |  |          |          |  |  |           |      |  |          |          |  |  |           |      |  |          |          |  |  |           |      |  |          |          |  |  |           |      |  |          |          |  |  |           |       |  |          |          |          |     |           |       |  |          |          |          |     |           |      |  |          |          |  |  |           |      |  |          |          |  |  |           |      |  |          |          |  |  |           |      |  |          |          |  |  |           |      |  |          |          |  |  |           |      |  |          |          |  |  |           |      |  |          |          |  |  |           |      |  |          |          |  |  |           |      |  |          |          |  |  |           |      |  |          |          |  |  |           |       |  |          |          |          |    |           |       |  |          |          |          |     |           |      |  |          |          |  |  |           |      |  |          |          |  |  |           |      |  |          |          |  |  |           |      |  |          |          |  |  |           |      |  |          |          |  |  |           |      |  |          |          |  |  |           |      |  |          |          |  |  |
| APR27C033                                                                                                                        | S-23                                                     |                                                                                                                                                                                                                                                                                                                                                                                                                                                                                                                                                                                                                                                                                                                                                                                                                                                                                                                                                                                                                                                                                                                                                                                                                                                                                                                                                                                                                                                                                                                                                                                                                                                                                                                                                                                                                                                                                                                                                                                                                                                                                                                                                                                                                                                                                                                                                                                                                                                                                                                                                                                                                                                                                                                                                                                                                                                                                                                                                                                                                                                                                                                                                                                                                                                                                                                                                                                                                                                                                                                                                                                                                                                                                                                                                                                                                                                                                                                                                                                                                                                                                                                                                                                                                                                                                                      | 0.282494    | 0.000031 |           |         |  |           |             |         |             |     |           |         |           |       |  |          |          |          |     |           |       |  |          |          |          |     |           |      |  |          |          |          |     |           |      |  |          |          |          |    |           |     |  |          |          |          |    |           |     |  |          |          |          |     |           |      |  |          |          |  |  |           |      |  |          |          |  |  |           |      |  |          |          |  |  |           |      |  |          |          |  |  |           |      |  |          |          |  |  |           |      |  |          |          |  |  |           |      |  |          |          |  |  |           |      |  |          |          |  |  |           |      |  |          |          |  |  |           |      |  |          |          |  |  |           |       |  |          |          |          |     |           |       |  |          |          |          |     |           |      |  |          |          |  |  |           |      |  |          |          |  |  |           |      |  |          |          |  |  |           |      |  |          |          |  |  |           |      |  |          |          |  |  |           |      |  |          |          |  |  |           |      |  |          |          |  |  |           |      |  |          |          |  |  |           |      |  |          |          |  |  |           |      |  |          |          |  |  |           |       |  |          |          |          |    |           |       |  |          |          |          |     |           |      |  |          |          |  |  |           |      |  |          |          |  |  |           |      |  |          |          |  |  |           |      |  |          |          |  |  |           |      |  |          |          |  |  |           |      |  |          |          |  |  |           |      |  |          |          |  |  |
| APR27C034                                                                                                                        | S-24                                                     |                                                                                                                                                                                                                                                                                                                                                                                                                                                                                                                                                                                                                                                                                                                                                                                                                                                                                                                                                                                                                                                                                                                                                                                                                                                                                                                                                                                                                                                                                                                                                                                                                                                                                                                                                                                                                                                                                                                                                                                                                                                                                                                                                                                                                                                                                                                                                                                                                                                                                                                                                                                                                                                                                                                                                                                                                                                                                                                                                                                                                                                                                                                                                                                                                                                                                                                                                                                                                                                                                                                                                                                                                                                                                                                                                                                                                                                                                                                                                                                                                                                                                                                                                                                                                                                                                                      | 0.282467    | 0.000037 |           |         |  |           |             |         |             |     |           |         |           |       |  |          |          |          |     |           |       |  |          |          |          |     |           |      |  |          |          |          |     |           |      |  |          |          |          |    |           |     |  |          |          |          |    |           |     |  |          |          |          |     |           |      |  |          |          |  |  |           |      |  |          |          |  |  |           |      |  |          |          |  |  |           |      |  |          |          |  |  |           |      |  |          |          |  |  |           |      |  |          |          |  |  |           |      |  |          |          |  |  |           |      |  |          |          |  |  |           |      |  |          |          |  |  |           |      |  |          |          |  |  |           |       |  |          |          |          |     |           |       |  |          |          |          |     |           |      |  |          |          |  |  |           |      |  |          |          |  |  |           |      |  |          |          |  |  |           |      |  |          |          |  |  |           |      |  |          |          |  |  |           |      |  |          |          |  |  |           |      |  |          |          |  |  |           |      |  |          |          |  |  |           |      |  |          |          |  |  |           |      |  |          |          |  |  |           |       |  |          |          |          |    |           |       |  |          |          |          |     |           |      |  |          |          |  |  |           |      |  |          |          |  |  |           |      |  |          |          |  |  |           |      |  |          |          |  |  |           |      |  |          |          |  |  |           |      |  |          |          |  |  |           |      |  |          |          |  |  |
| APR27C035                                                                                                                        | S-25                                                     |                                                                                                                                                                                                                                                                                                                                                                                                                                                                                                                                                                                                                                                                                                                                                                                                                                                                                                                                                                                                                                                                                                                                                                                                                                                                                                                                                                                                                                                                                                                                                                                                                                                                                                                                                                                                                                                                                                                                                                                                                                                                                                                                                                                                                                                                                                                                                                                                                                                                                                                                                                                                                                                                                                                                                                                                                                                                                                                                                                                                                                                                                                                                                                                                                                                                                                                                                                                                                                                                                                                                                                                                                                                                                                                                                                                                                                                                                                                                                                                                                                                                                                                                                                                                                                                                                                      | 0.282470    | 0.000037 |           |         |  |           |             |         |             |     |           |         |           |       |  |          |          |          |     |           |       |  |          |          |          |     |           |      |  |          |          |          |     |           |      |  |          |          |          |    |           |     |  |          |          |          |    |           |     |  |          |          |          |     |           |      |  |          |          |  |  |           |      |  |          |          |  |  |           |      |  |          |          |  |  |           |      |  |          |          |  |  |           |      |  |          |          |  |  |           |      |  |          |          |  |  |           |      |  |          |          |  |  |           |      |  |          |          |  |  |           |      |  |          |          |  |  |           |      |  |          |          |  |  |           |       |  |          |          |          |     |           |       |  |          |          |          |     |           |      |  |          |          |  |  |           |      |  |          |          |  |  |           |      |  |          |          |  |  |           |      |  |          |          |  |  |           |      |  |          |          |  |  |           |      |  |          |          |  |  |           |      |  |          |          |  |  |           |      |  |          |          |  |  |           |      |  |          |          |  |  |           |      |  |          |          |  |  |           |       |  |          |          |          |    |           |       |  |          |          |          |     |           |      |  |          |          |  |  |           |      |  |          |          |  |  |           |      |  |          |          |  |  |           |      |  |          |          |  |  |           |      |  |          |          |  |  |           |      |  |          |          |  |  |           |      |  |          |          |  |  |
| APR27C036                                                                                                                        | S-26                                                     |                                                                                                                                                                                                                                                                                                                                                                                                                                                                                                                                                                                                                                                                                                                                                                                                                                                                                                                                                                                                                                                                                                                                                                                                                                                                                                                                                                                                                                                                                                                                                                                                                                                                                                                                                                                                                                                                                                                                                                                                                                                                                                                                                                                                                                                                                                                                                                                                                                                                                                                                                                                                                                                                                                                                                                                                                                                                                                                                                                                                                                                                                                                                                                                                                                                                                                                                                                                                                                                                                                                                                                                                                                                                                                                                                                                                                                                                                                                                                                                                                                                                                                                                                                                                                                                                                                      | 0.282484    | 0.000043 |           |         |  |           |             |         |             |     |           |         |           |       |  |          |          |          |     |           |       |  |          |          |          |     |           |      |  |          |          |          |     |           |      |  |          |          |          |    |           |     |  |          |          |          |    |           |     |  |          |          |          |     |           |      |  |          |          |  |  |           |      |  |          |          |  |  |           |      |  |          |          |  |  |           |      |  |          |          |  |  |           |      |  |          |          |  |  |           |      |  |          |          |  |  |           |      |  |          |          |  |  |           |      |  |          |          |  |  |           |      |  |          |          |  |  |           |      |  |          |          |  |  |           |       |  |          |          |          |     |           |       |  |          |          |          |     |           |      |  |          |          |  |  |           |      |  |          |          |  |  |           |      |  |          |          |  |  |           |      |  |          |          |  |  |           |      |  |          |          |  |  |           |      |  |          |          |  |  |           |      |  |          |          |  |  |           |      |  |          |          |  |  |           |      |  |          |          |  |  |           |      |  |          |          |  |  |           |       |  |          |          |          |    |           |       |  |          |          |          |     |           |      |  |          |          |  |  |           |      |  |          |          |  |  |           |      |  |          |          |  |  |           |      |  |          |          |  |  |           |      |  |          |          |  |  |           |      |  |          |          |  |  |           |      |  |          |          |  |  |
| APR27C037                                                                                                                        | S-27                                                     |                                                                                                                                                                                                                                                                                                                                                                                                                                                                                                                                                                                                                                                                                                                                                                                                                                                                                                                                                                                                                                                                                                                                                                                                                                                                                                                                                                                                                                                                                                                                                                                                                                                                                                                                                                                                                                                                                                                                                                                                                                                                                                                                                                                                                                                                                                                                                                                                                                                                                                                                                                                                                                                                                                                                                                                                                                                                                                                                                                                                                                                                                                                                                                                                                                                                                                                                                                                                                                                                                                                                                                                                                                                                                                                                                                                                                                                                                                                                                                                                                                                                                                                                                                                                                                                                                                      | 0.282489    | 0.000042 |           |         |  |           |             |         |             |     |           |         |           |       |  |          |          |          |     |           |       |  |          |          |          |     |           |      |  |          |          |          |     |           |      |  |          |          |          |    |           |     |  |          |          |          |    |           |     |  |          |          |          |     |           |      |  |          |          |  |  |           |      |  |          |          |  |  |           |      |  |          |          |  |  |           |      |  |          |          |  |  |           |      |  |          |          |  |  |           |      |  |          |          |  |  |           |      |  |          |          |  |  |           |      |  |          |          |  |  |           |      |  |          |          |  |  |           |      |  |          |          |  |  |           |       |  |          |          |          |     |           |       |  |          |          |          |     |           |      |  |          |          |  |  |           |      |  |          |          |  |  |           |      |  |          |          |  |  |           |      |  |          |          |  |  |           |      |  |          |          |  |  |           |      |  |          |          |  |  |           |      |  |          |          |  |  |           |      |  |          |          |  |  |           |      |  |          |          |  |  |           |      |  |          |          |  |  |           |       |  |          |          |          |    |           |       |  |          |          |          |     |           |      |  |          |          |  |  |           |      |  |          |          |  |  |           |      |  |          |          |  |  |           |      |  |          |          |  |  |           |      |  |          |          |  |  |           |      |  |          |          |  |  |           |      |  |          |          |  |  |
| <h2 style="margin: 0;">检测报告</h2> <p style="margin: 0;">DETECTING AND ANALYZING REPORT</p>                                        |                                                          |                                                                                                                                                                                                                                                                                                                                                                                                                                                                                                                                                                                                                                                                                                                                                                                                                                                                                                                                                                                                                                                                                                                                                                                                                                                                                                                                                                                                                                                                                                                                                                                                                                                                                                                                                                                                                                                                                                                                                                                                                                                                                                                                                                                                                                                                                                                                                                                                                                                                                                                                                                                                                                                                                                                                                                                                                                                                                                                                                                                                                                                                                                                                                                                                                                                                                                                                                                                                                                                                                                                                                                                                                                                                                                                                                                                                                                                                                                                                                                                                                                                                                                                                                                                                                                                                                                      |             |          |           |         |  |           |             |         |             |     |           |         |           |       |  |          |          |          |     |           |       |  |          |          |          |     |           |      |  |          |          |          |     |           |      |  |          |          |          |    |           |     |  |          |          |          |    |           |     |  |          |          |          |     |           |      |  |          |          |  |  |           |      |  |          |          |  |  |           |      |  |          |          |  |  |           |      |  |          |          |  |  |           |      |  |          |          |  |  |           |      |  |          |          |  |  |           |      |  |          |          |  |  |           |      |  |          |          |  |  |           |      |  |          |          |  |  |           |      |  |          |          |  |  |           |       |  |          |          |          |     |           |       |  |          |          |          |     |           |      |  |          |          |  |  |           |      |  |          |          |  |  |           |      |  |          |          |  |  |           |      |  |          |          |  |  |           |      |  |          |          |  |  |           |      |  |          |          |  |  |           |      |  |          |          |  |  |           |      |  |          |          |  |  |           |      |  |          |          |  |  |           |      |  |          |          |  |  |           |       |  |          |          |          |    |           |       |  |          |          |          |     |           |      |  |          |          |  |  |           |      |  |          |          |  |  |           |      |  |          |          |  |  |           |      |  |          |          |  |  |           |      |  |          |          |  |  |           |      |  |          |          |  |  |           |      |  |          |          |  |  |
| 报告编号<br>SERIES NUMBER<br>样品名称<br>SAMPLE NAME<br>委托单位<br>ENTRUSTING UNIT<br>检测类别<br>DETECTING TYPE<br>报告制作人<br>RESPONSIBLE PERSON | MC19_024_ZHANGWEN<br>磁石<br>中国地质大学 (武汉)<br>南区磁石中院位置<br>张文 |                                                                                                                                                                                                                                                                                                                                                                                                                                                                                                                                                                                                                                                                                                                                                                                                                                                                                                                                                                                                                                                                                                                                                                                                                                                                                                                                                                                                                                                                                                                                                                                                                                                                                                                                                                                                                                                                                                                                                                                                                                                                                                                                                                                                                                                                                                                                                                                                                                                                                                                                                                                                                                                                                                                                                                                                                                                                                                                                                                                                                                                                                                                                                                                                                                                                                                                                                                                                                                                                                                                                                                                                                                                                                                                                                                                                                                                                                                                                                                                                                                                                                                                                                                                                                                                                                                      |             |          |           |         |  |           |             |         |             |     |           |         |           |       |  |          |          |          |     |           |       |  |          |          |          |     |           |      |  |          |          |          |     |           |      |  |          |          |          |    |           |     |  |          |          |          |    |           |     |  |          |          |          |     |           |      |  |          |          |  |  |           |      |  |          |          |  |  |           |      |  |          |          |  |  |           |      |  |          |          |  |  |           |      |  |          |          |  |  |           |      |  |          |          |  |  |           |      |  |          |          |  |  |           |      |  |          |          |  |  |           |      |  |          |          |  |  |           |      |  |          |          |  |  |           |       |  |          |          |          |     |           |       |  |          |          |          |     |           |      |  |          |          |  |  |           |      |  |          |          |  |  |           |      |  |          |          |  |  |           |      |  |          |          |  |  |           |      |  |          |          |  |  |           |      |  |          |          |  |  |           |      |  |          |          |  |  |           |      |  |          |          |  |  |           |      |  |          |          |  |  |           |      |  |          |          |  |  |           |       |  |          |          |          |    |           |       |  |          |          |          |     |           |      |  |          |          |  |  |           |      |  |          |          |  |  |           |      |  |          |          |  |  |           |      |  |          |          |  |  |           |      |  |          |          |  |  |           |      |  |          |          |  |  |           |      |  |          |          |  |  |
| 检测单位 (公章)<br>DETECTING AND ANALYZING UNIT                                                                                        | 中国地质大学地质过程与矿产资源国家重点<br>实验室                               |                                                                                                                                                                                                                                                                                                                                                                                                                                                                                                                                                                                                                                                                                                                                                                                                                                                                                                                                                                                                                                                                                                                                                                                                                                                                                                                                                                                                                                                                                                                                                                                                                                                                                                                                                                                                                                                                                                                                                                                                                                                                                                                                                                                                                                                                                                                                                                                                                                                                                                                                                                                                                                                                                                                                                                                                                                                                                                                                                                                                                                                                                                                                                                                                                                                                                                                                                                                                                                                                                                                                                                                                                                                                                                                                                                                                                                                                                                                                                                                                                                                                                                                                                                                                                                                                                                      |             |          |           |         |  |           |             |         |             |     |           |         |           |       |  |          |          |          |     |           |       |  |          |          |          |     |           |      |  |          |          |          |     |           |      |  |          |          |          |    |           |     |  |          |          |          |    |           |     |  |          |          |          |     |           |      |  |          |          |  |  |           |      |  |          |          |  |  |           |      |  |          |          |  |  |           |      |  |          |          |  |  |           |      |  |          |          |  |  |           |      |  |          |          |  |  |           |      |  |          |          |  |  |           |      |  |          |          |  |  |           |      |  |          |          |  |  |           |      |  |          |          |  |  |           |       |  |          |          |          |     |           |       |  |          |          |          |     |           |      |  |          |          |  |  |           |      |  |          |          |  |  |           |      |  |          |          |  |  |           |      |  |          |          |  |  |           |      |  |          |          |  |  |           |      |  |          |          |  |  |           |      |  |          |          |  |  |           |      |  |          |          |  |  |           |      |  |          |          |  |  |           |      |  |          |          |  |  |           |       |  |          |          |          |    |           |       |  |          |          |          |     |           |      |  |          |          |  |  |           |      |  |          |          |  |  |           |      |  |          |          |  |  |           |      |  |          |          |  |  |           |      |  |          |          |  |  |           |      |  |          |          |  |  |           |      |  |          |          |  |  |
| 报告发送日期:<br>REPORTING DATE                                                                                                        | 2019/8/16                                                |                                                                                                                                                                                                                                                                                                                                                                                                                                                                                                                                                                                                                                                                                                                                                                                                                                                                                                                                                                                                                                                                                                                                                                                                                                                                                                                                                                                                                                                                                                                                                                                                                                                                                                                                                                                                                                                                                                                                                                                                                                                                                                                                                                                                                                                                                                                                                                                                                                                                                                                                                                                                                                                                                                                                                                                                                                                                                                                                                                                                                                                                                                                                                                                                                                                                                                                                                                                                                                                                                                                                                                                                                                                                                                                                                                                                                                                                                                                                                                                                                                                                                                                                                                                                                                                                                                      |             |          |           |         |  |           |             |         |             |     |           |         |           |       |  |          |          |          |     |           |       |  |          |          |          |     |           |      |  |          |          |          |     |           |      |  |          |          |          |    |           |     |  |          |          |          |    |           |     |  |          |          |          |     |           |      |  |          |          |  |  |           |      |  |          |          |  |  |           |      |  |          |          |  |  |           |      |  |          |          |  |  |           |      |  |          |          |  |  |           |      |  |          |          |  |  |           |      |  |          |          |  |  |           |      |  |          |          |  |  |           |      |  |          |          |  |  |           |      |  |          |          |  |  |           |       |  |          |          |          |     |           |       |  |          |          |          |     |           |      |  |          |          |  |  |           |      |  |          |          |  |  |           |      |  |          |          |  |  |           |      |  |          |          |  |  |           |      |  |          |          |  |  |           |      |  |          |          |  |  |           |      |  |          |          |  |  |           |      |  |          |          |  |  |           |      |  |          |          |  |  |           |      |  |          |          |  |  |           |       |  |          |          |          |    |           |       |  |          |          |          |     |           |      |  |          |          |  |  |           |      |  |          |          |  |  |           |      |  |          |          |  |  |           |      |  |          |          |  |  |           |      |  |          |          |  |  |           |      |  |          |          |  |  |           |      |  |          |          |  |  |

Figure 4.5 Formatted data export results
